# Supplementary material for: Copper-catalyzed aerobic oxidative synthesis of aryl nitriles from benzylic alcohols and aqueous ammonia
Source: Royal Society of Chemistry journal article supplement (doi:10.1039/c3ob00002h), 2013-01-01

## **Electronic Supplementary Information**

# **Copper-catalyzed aerobic oxidative synthesis of aryl nitriles from benzylic alcohols and aqueous ammonia**

**Chuanzhou Tao,\* Feng Liu, Youmin Zhu, Weiwei Liu, Zhiling Cao**

School of Chemical Engineering, Huaihai Institute of Technology, Lianyungang 222005, P. R. of China

Fax +86(518)85895401; E-mail: chuanzhoutao@yahoo.com.cn

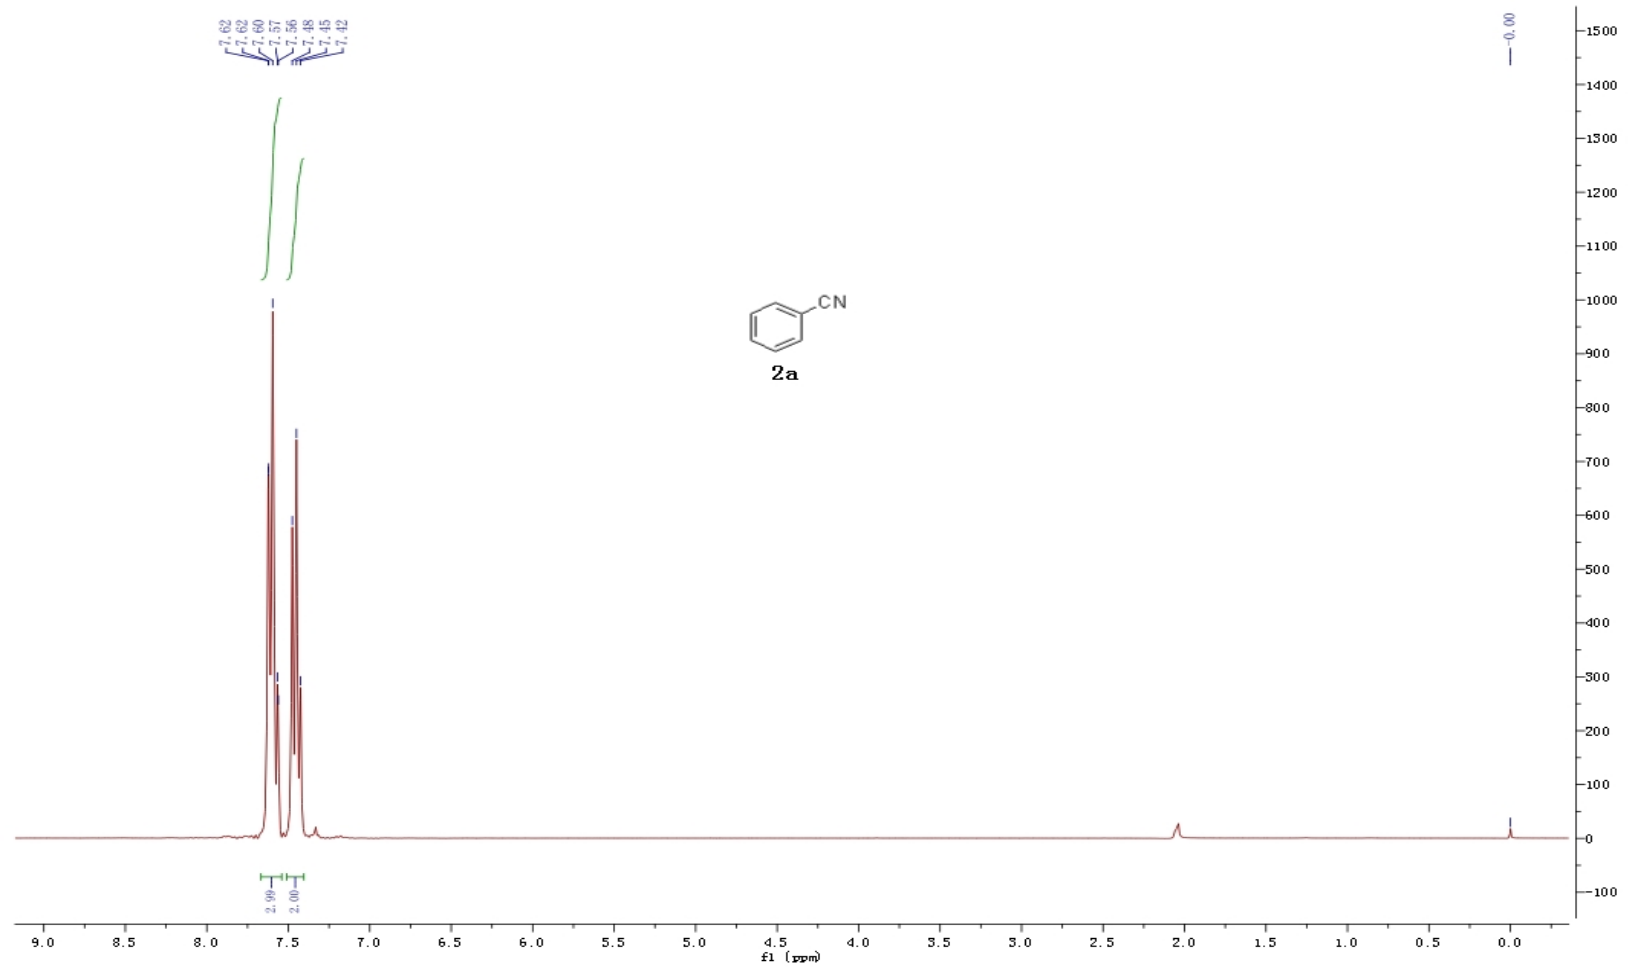

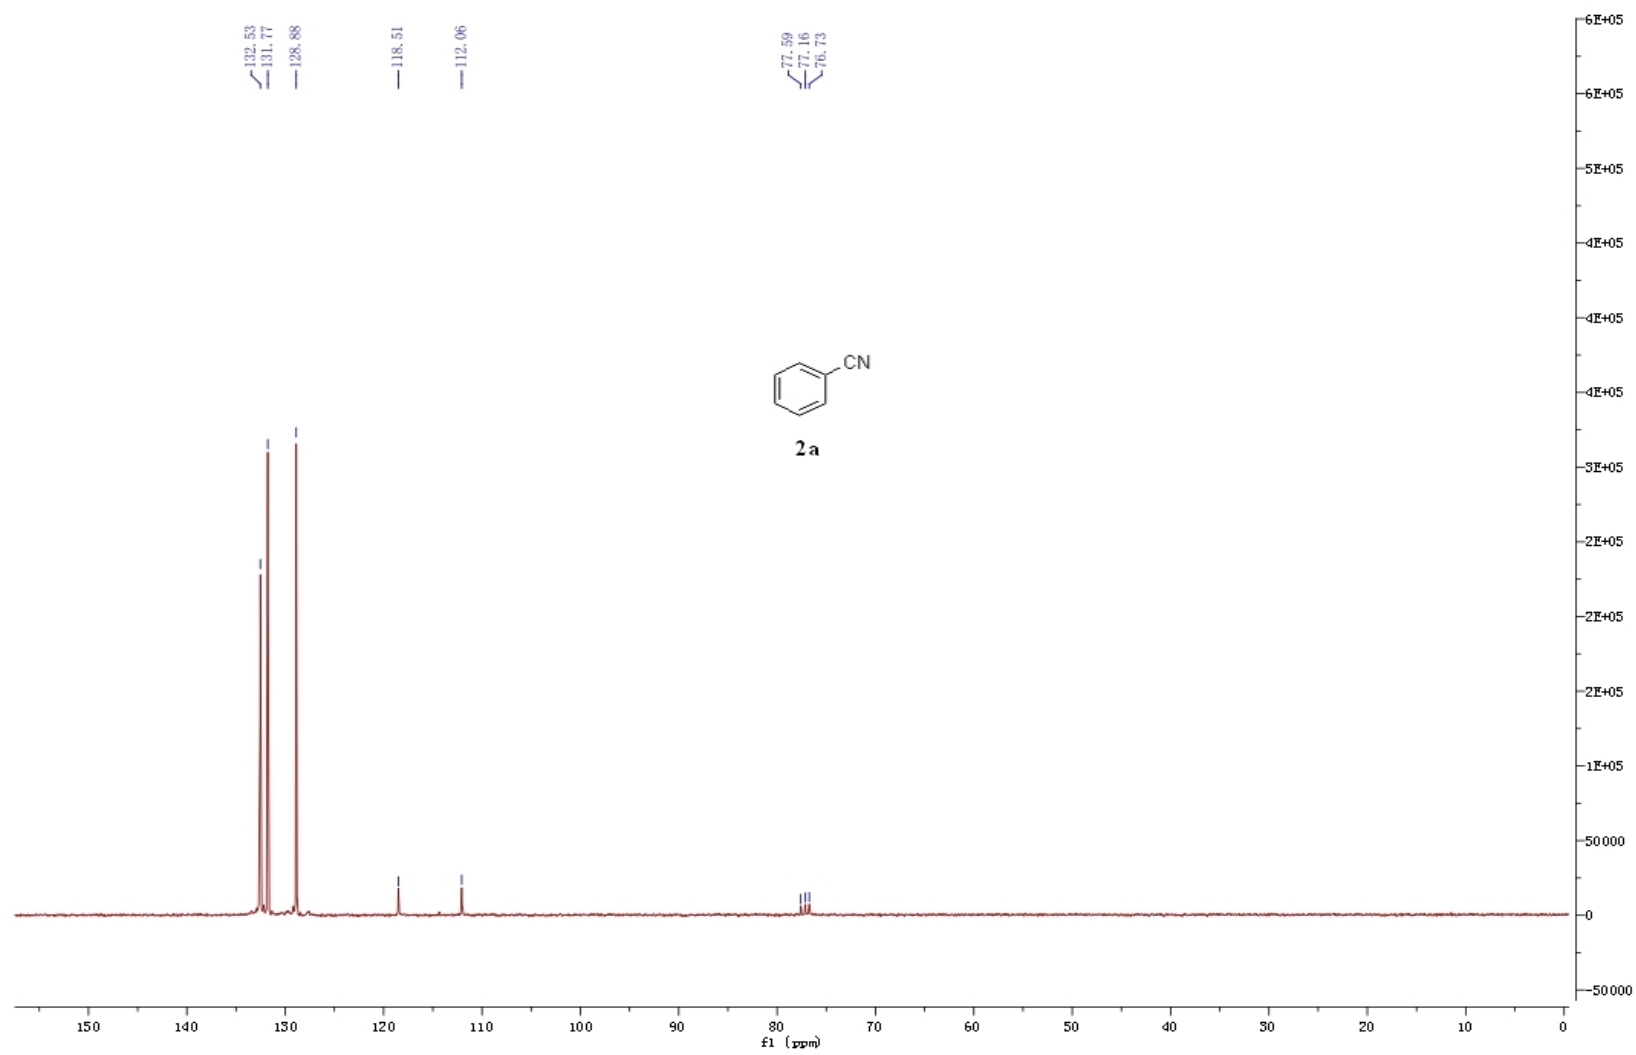

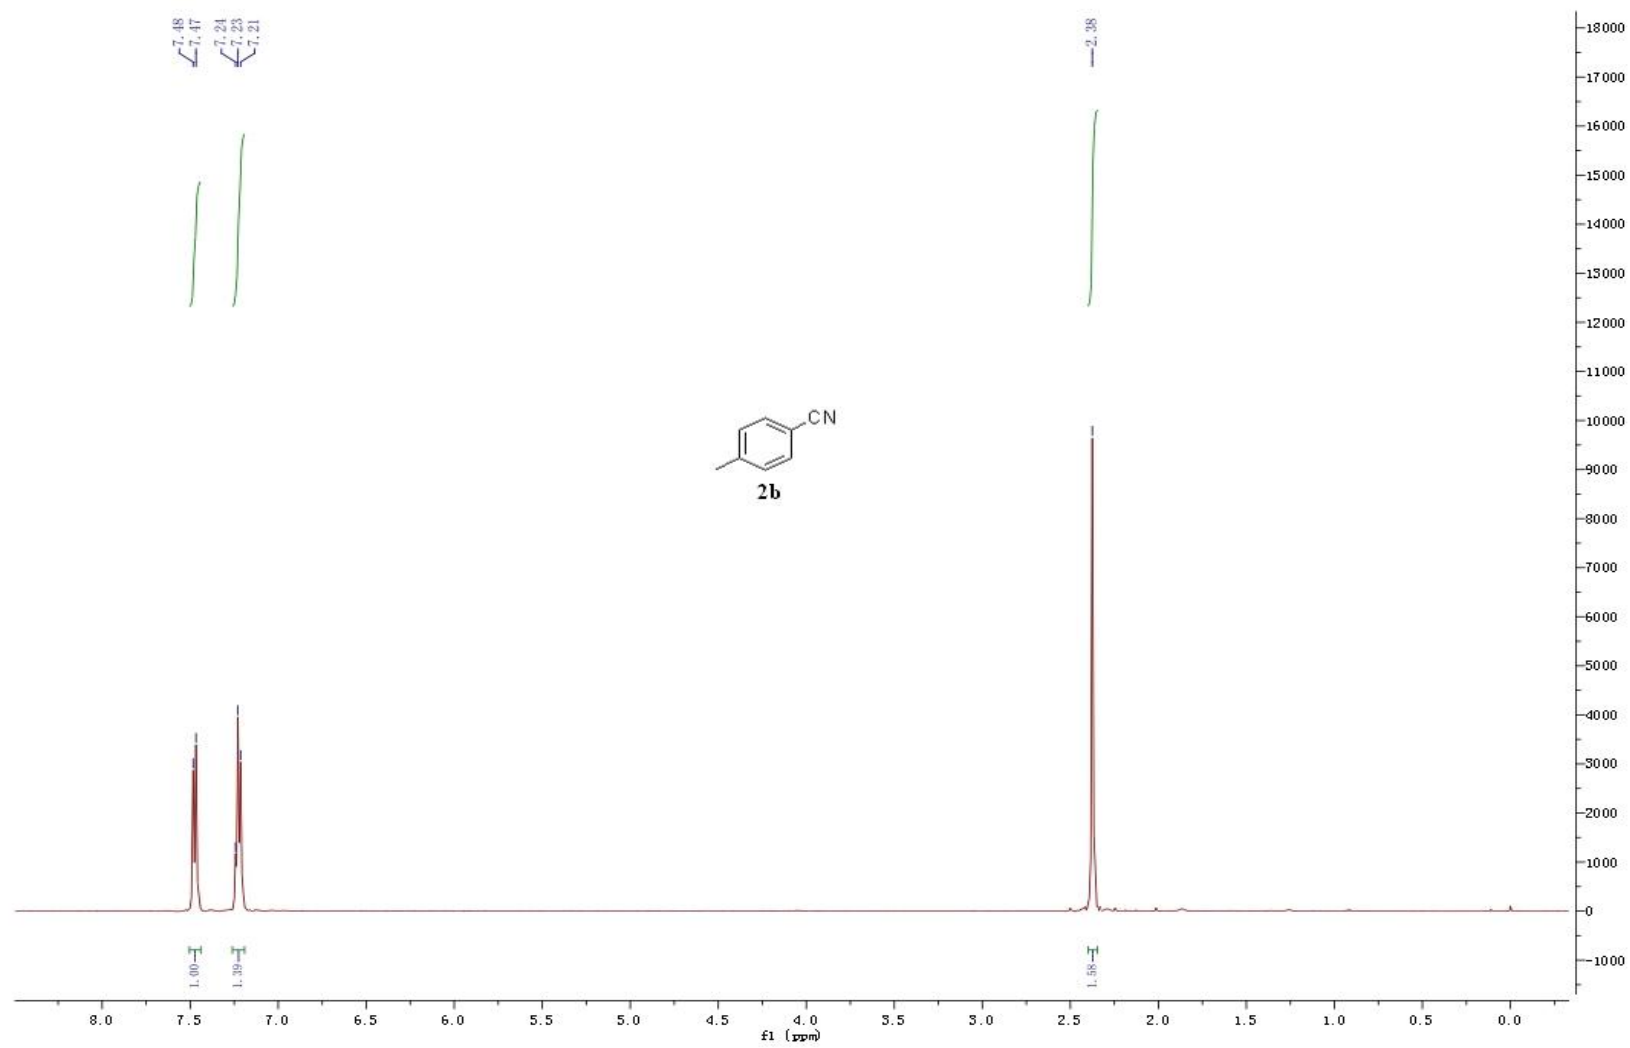

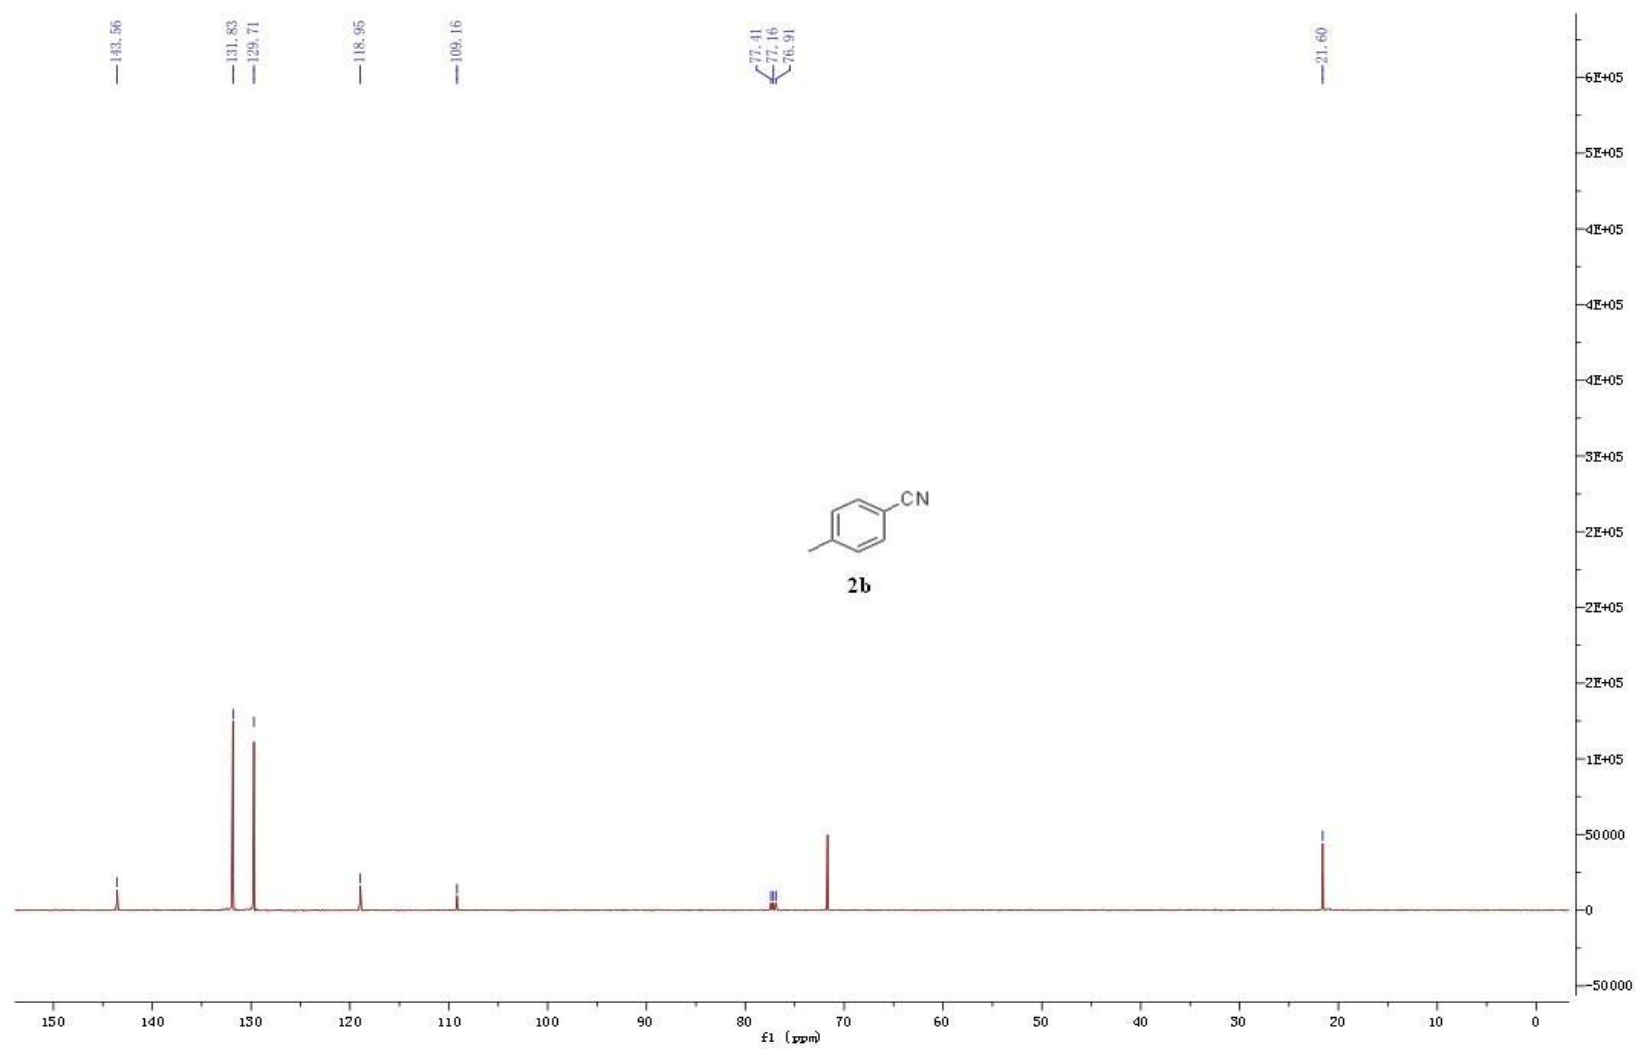

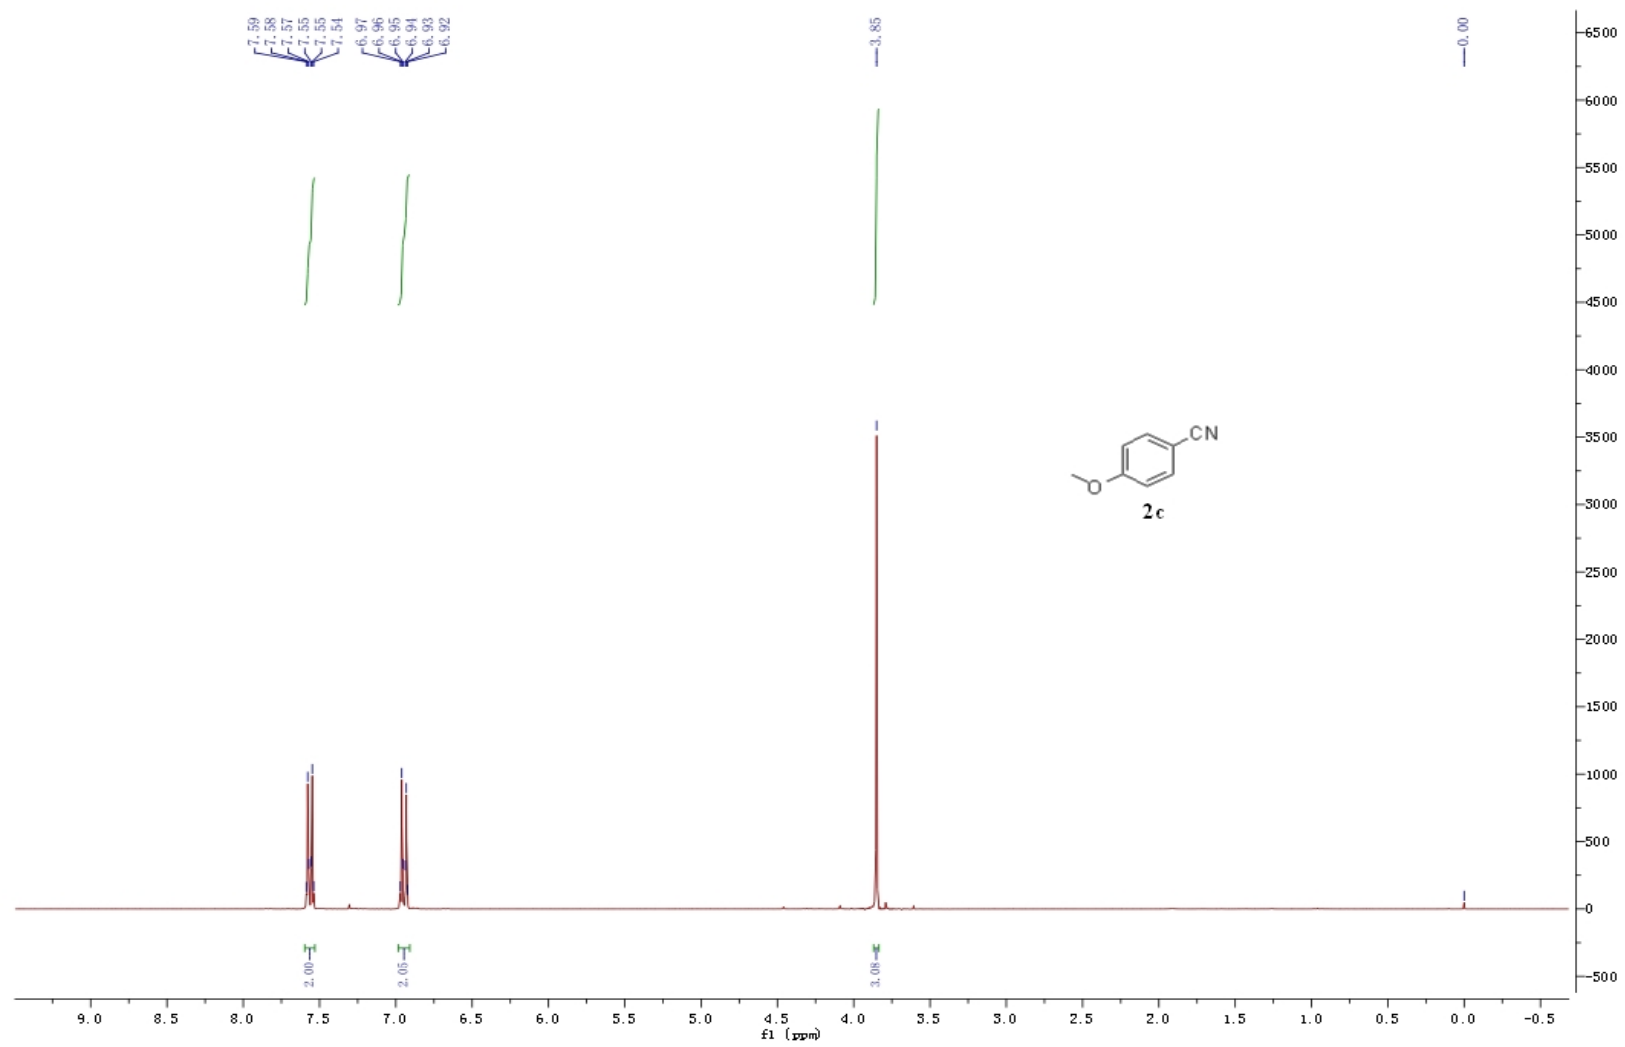

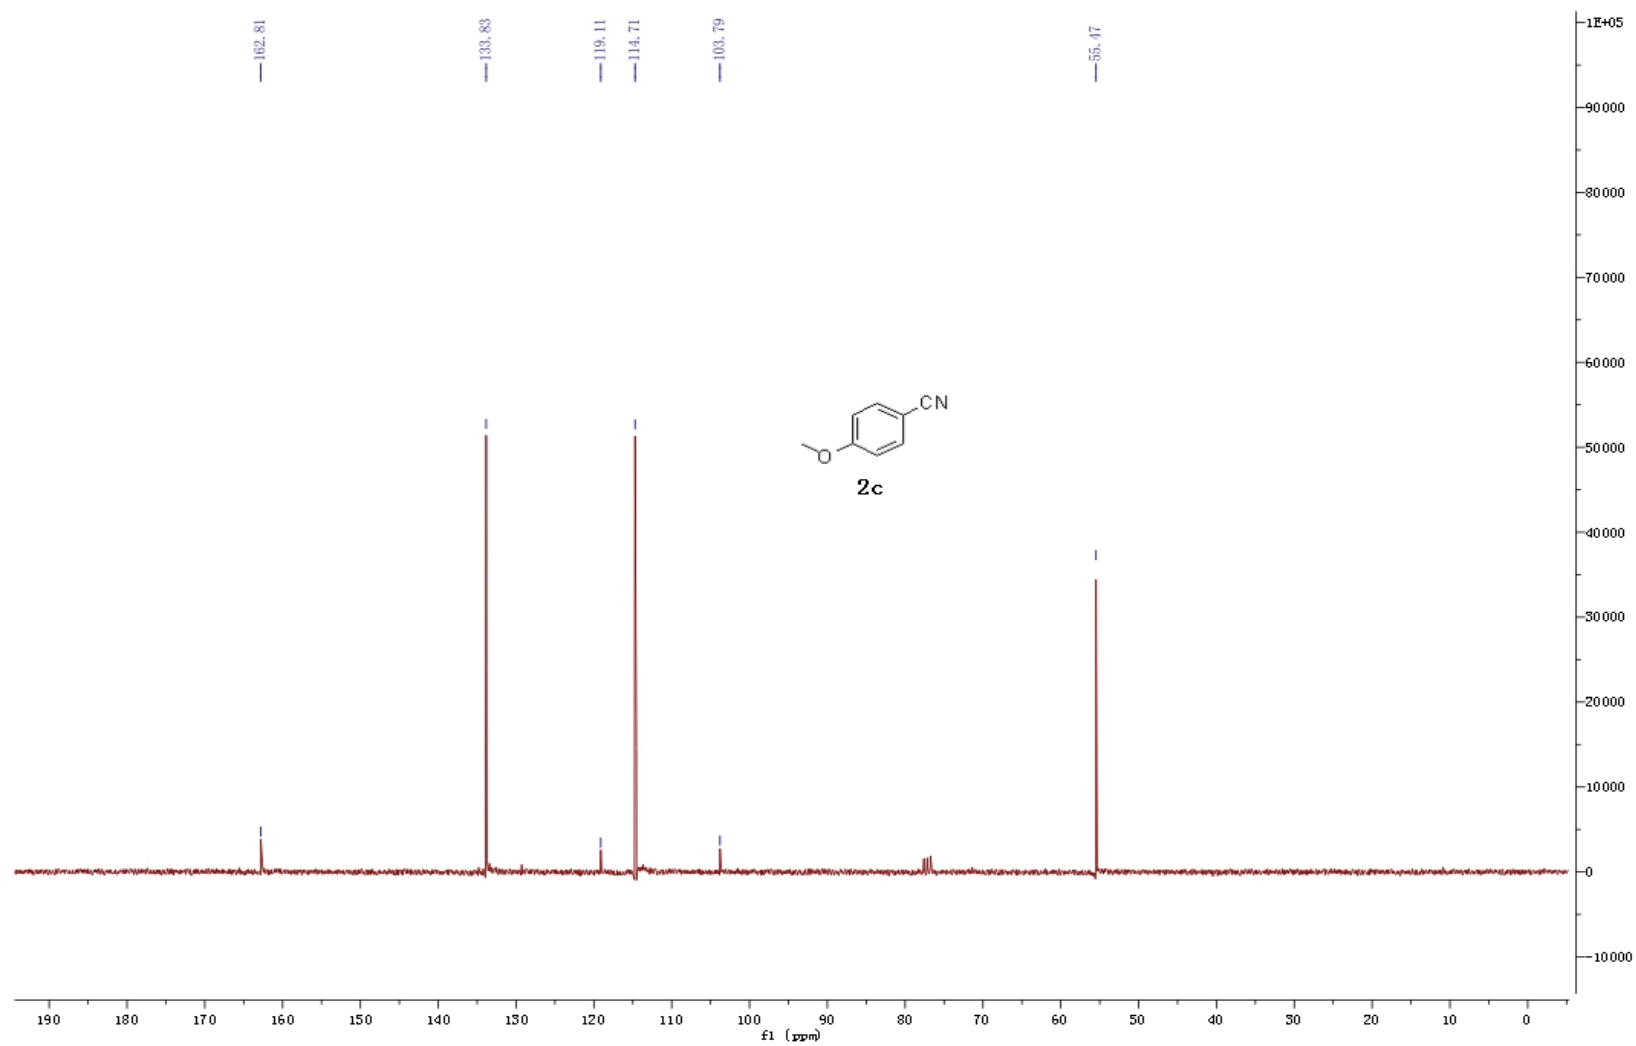

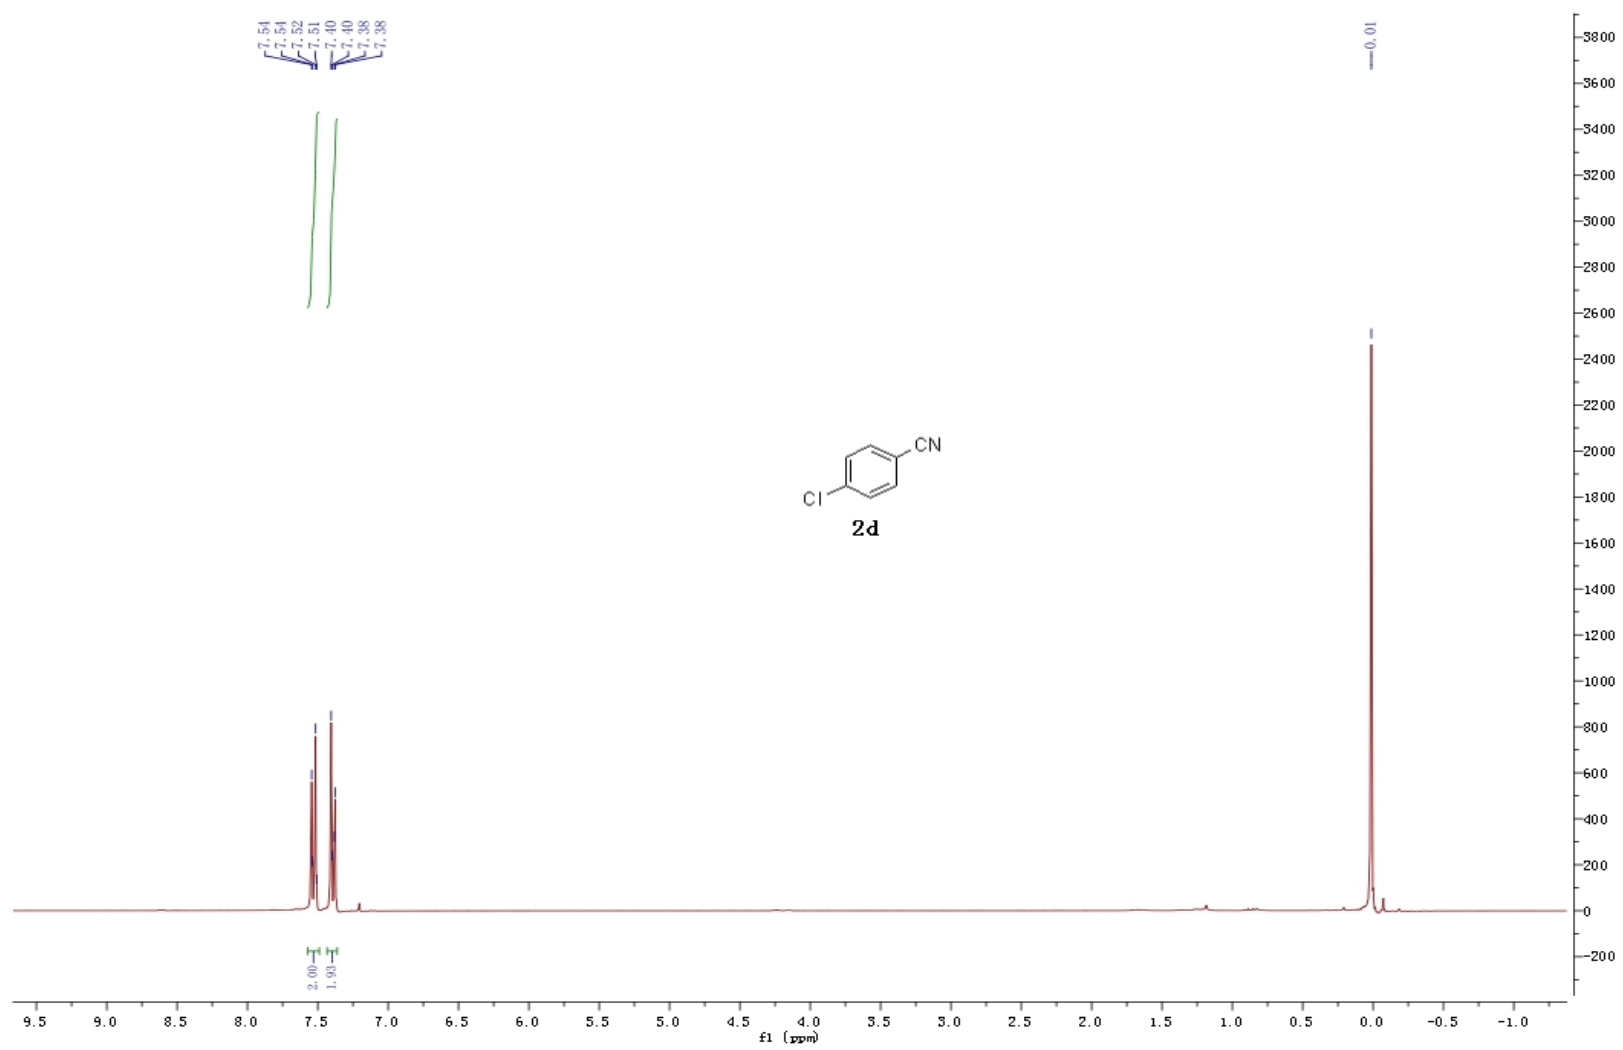



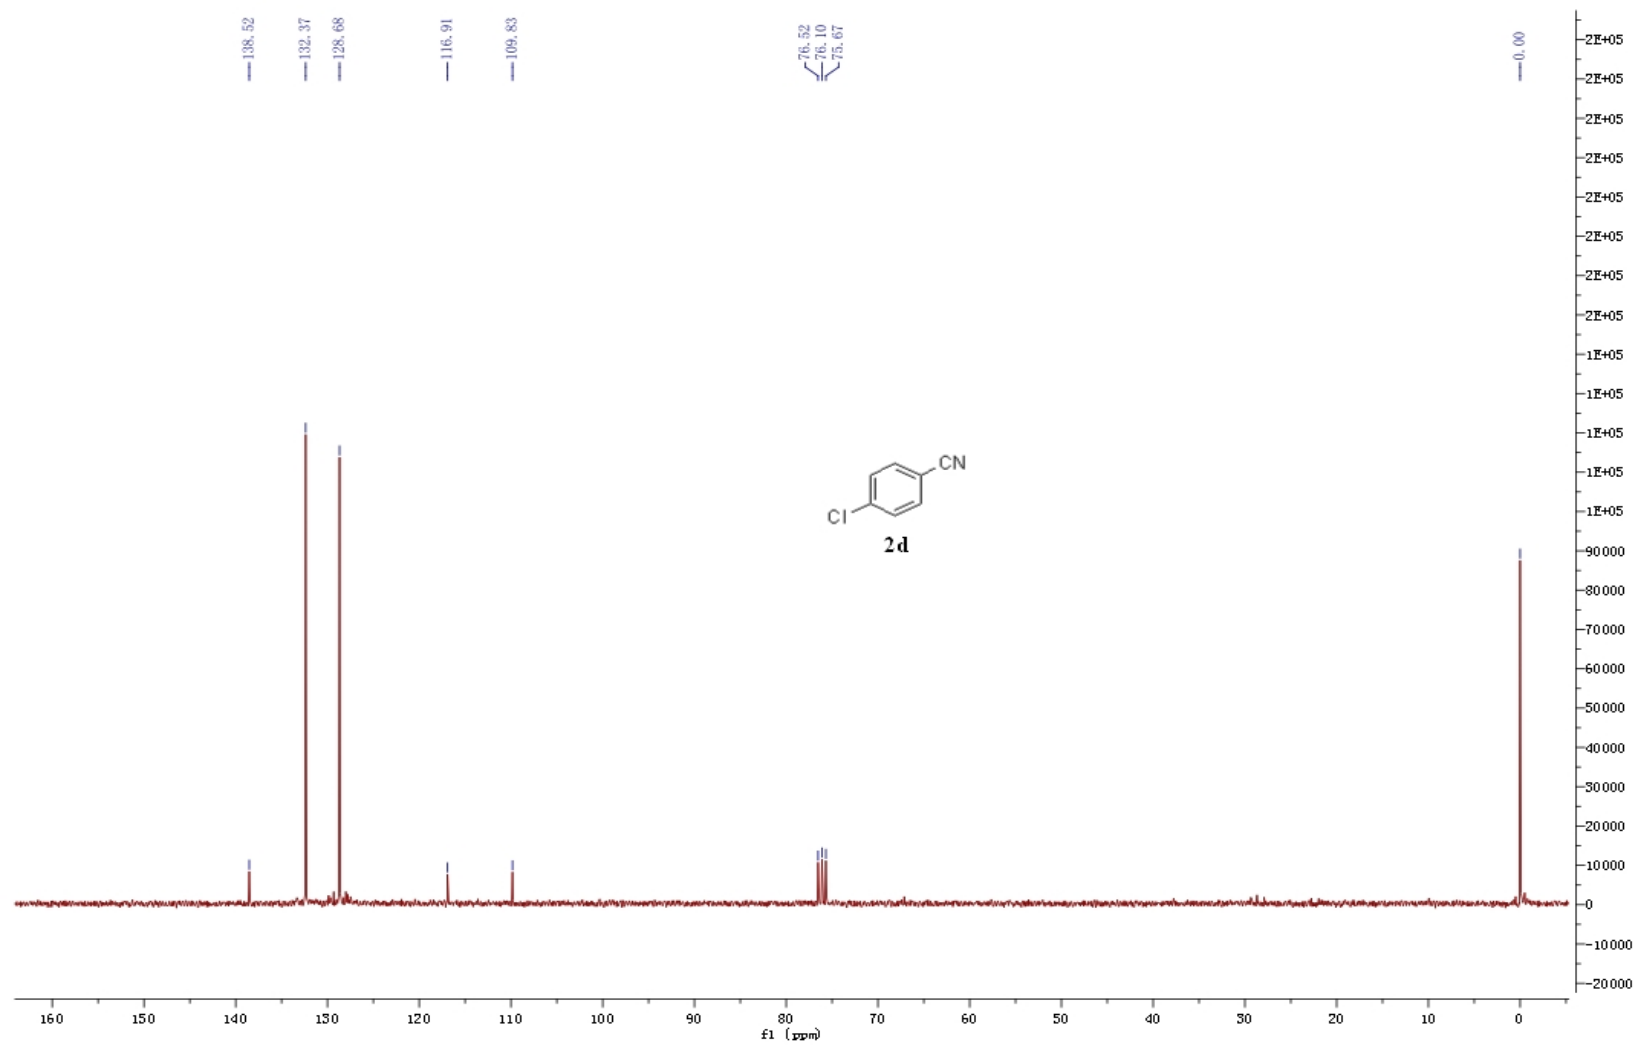

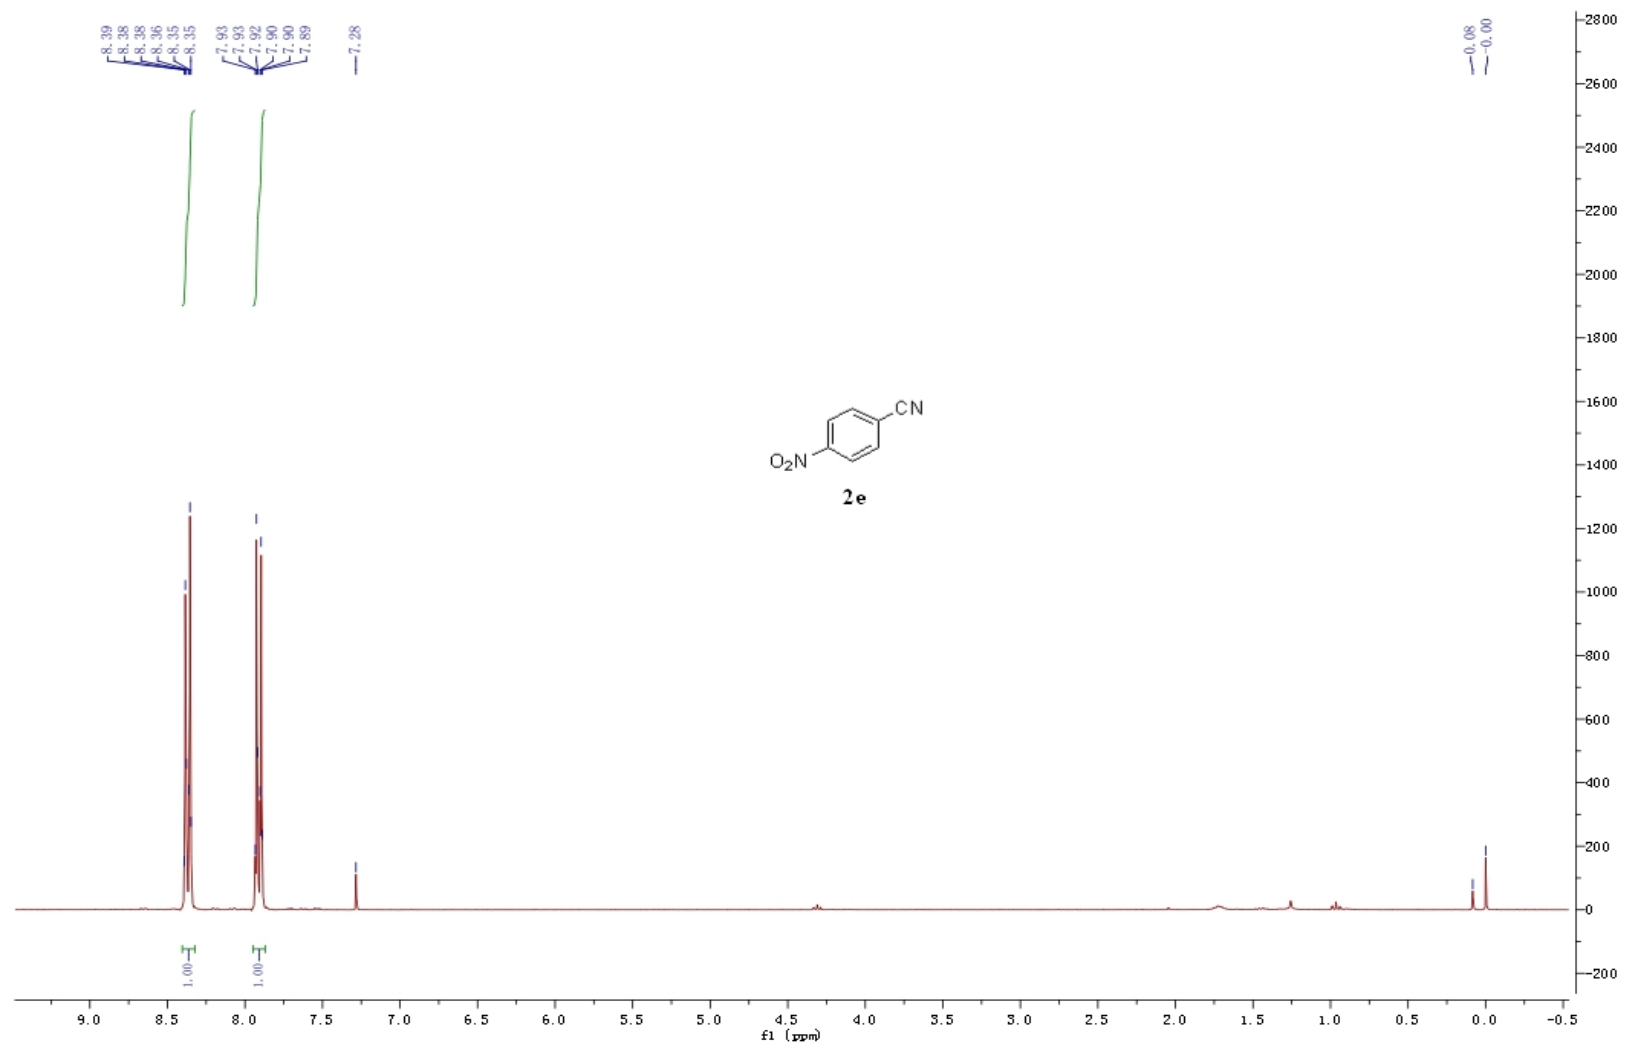

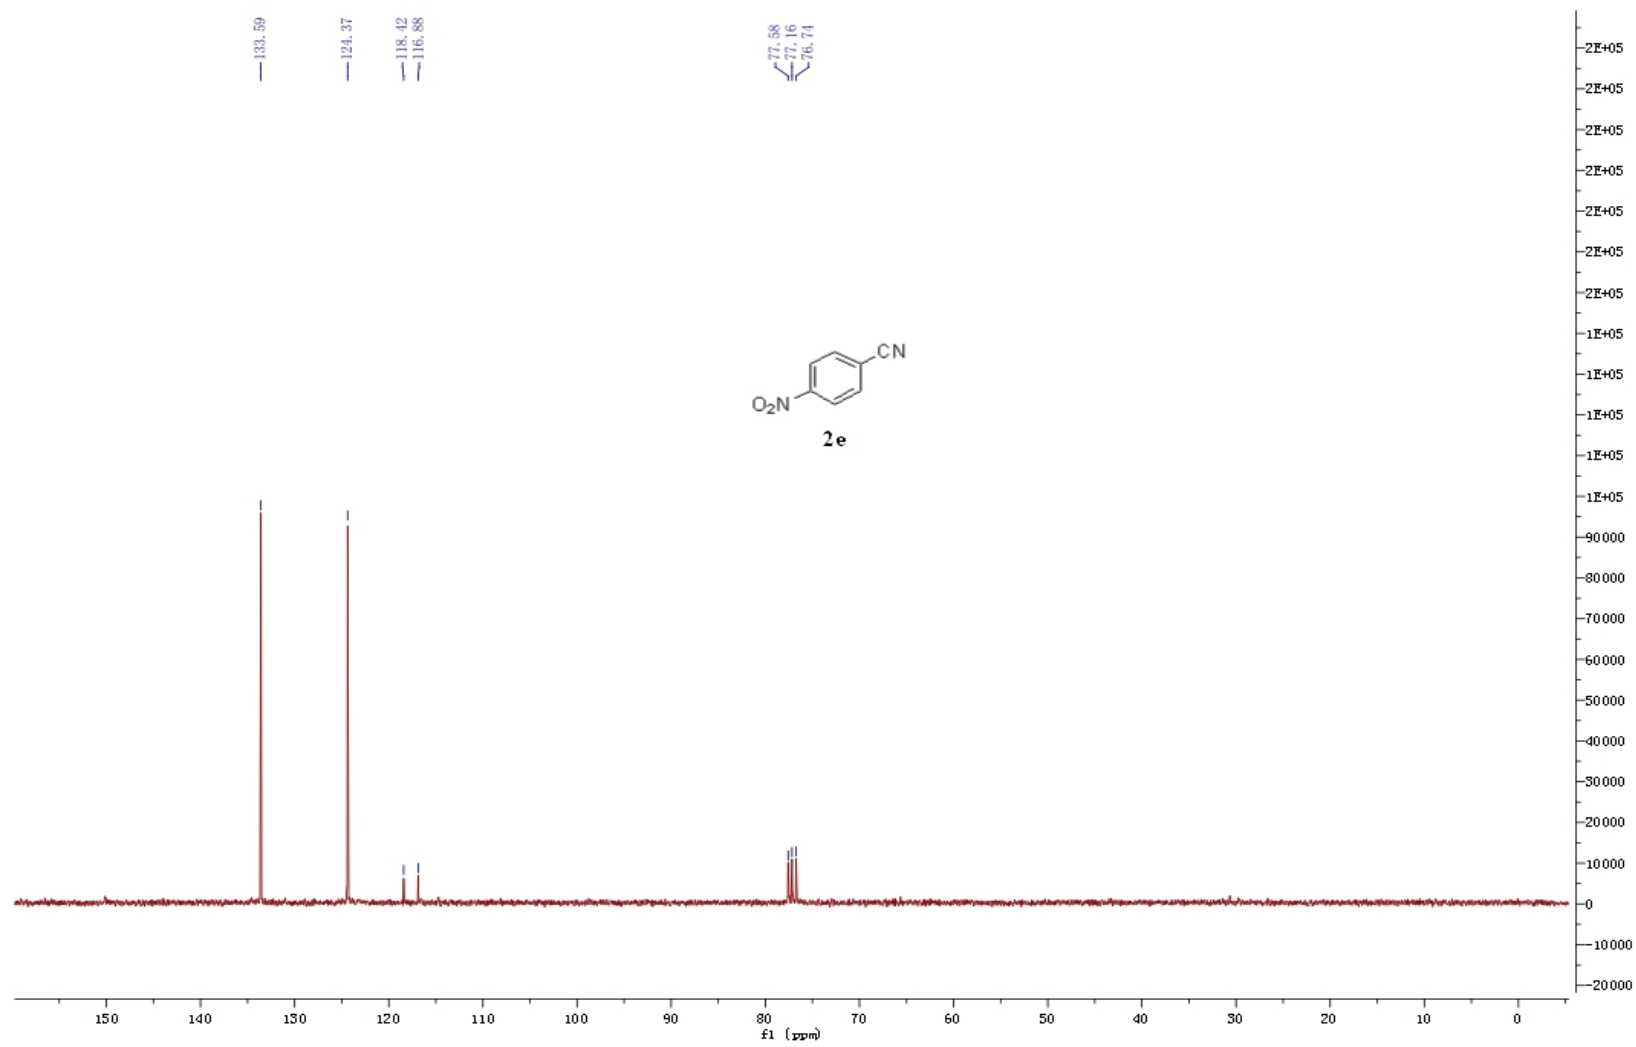

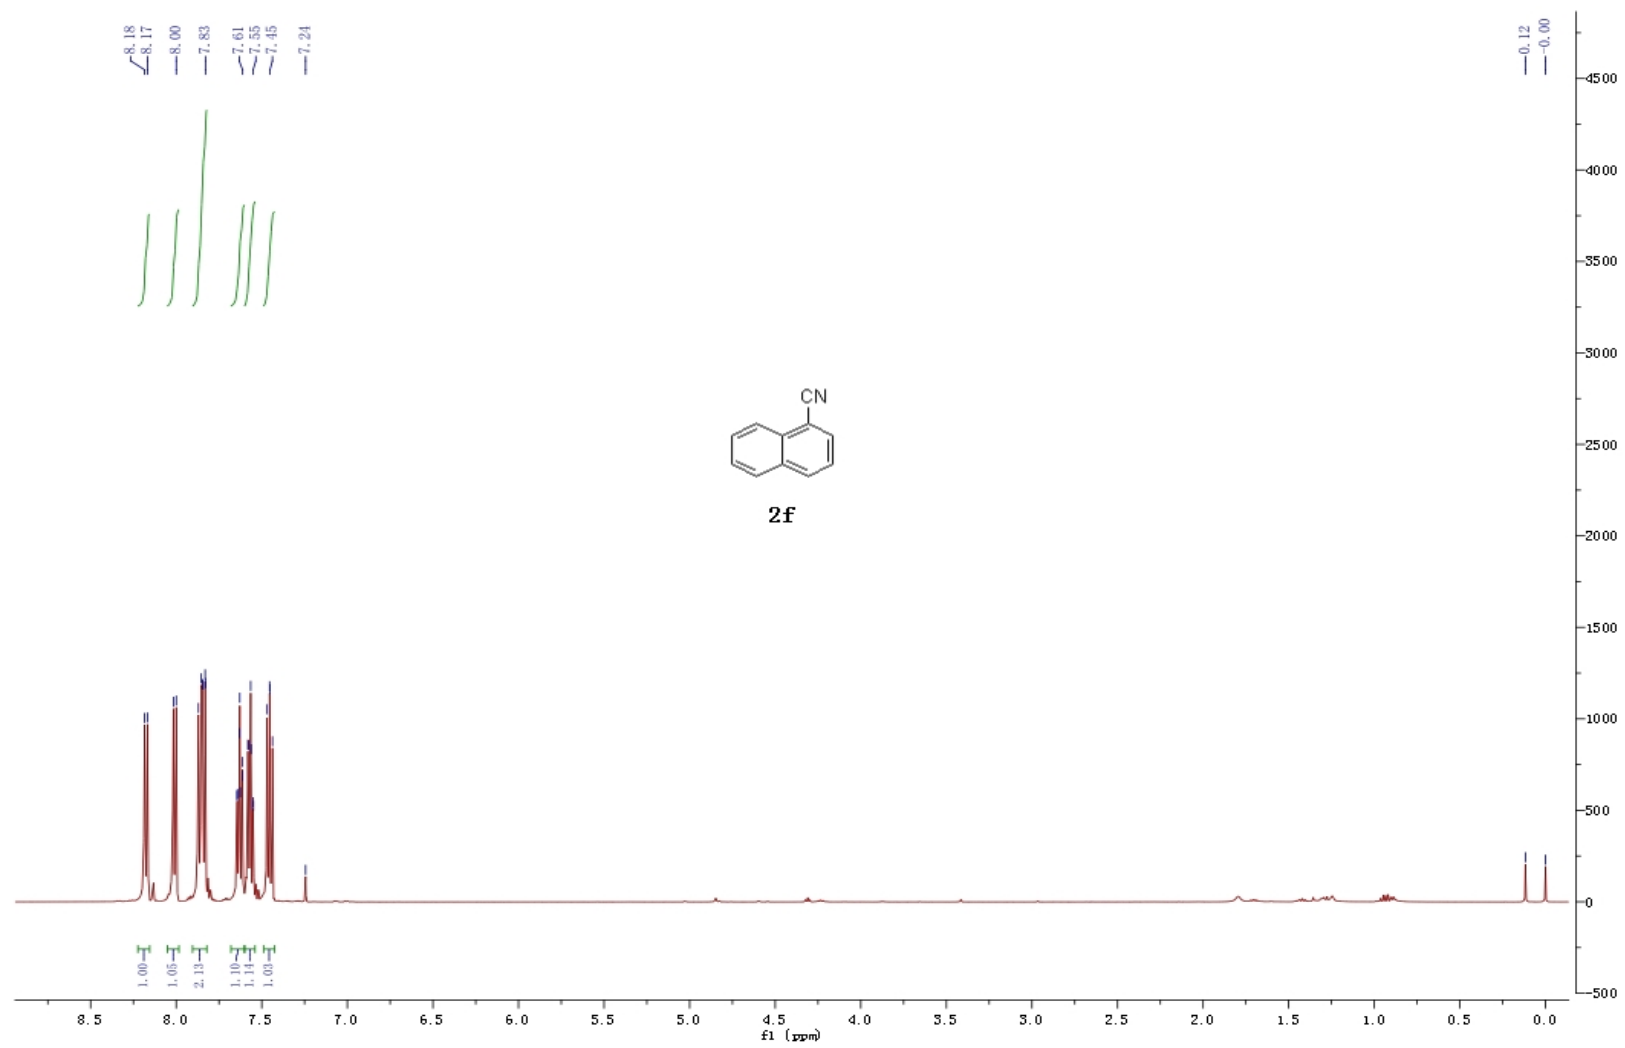

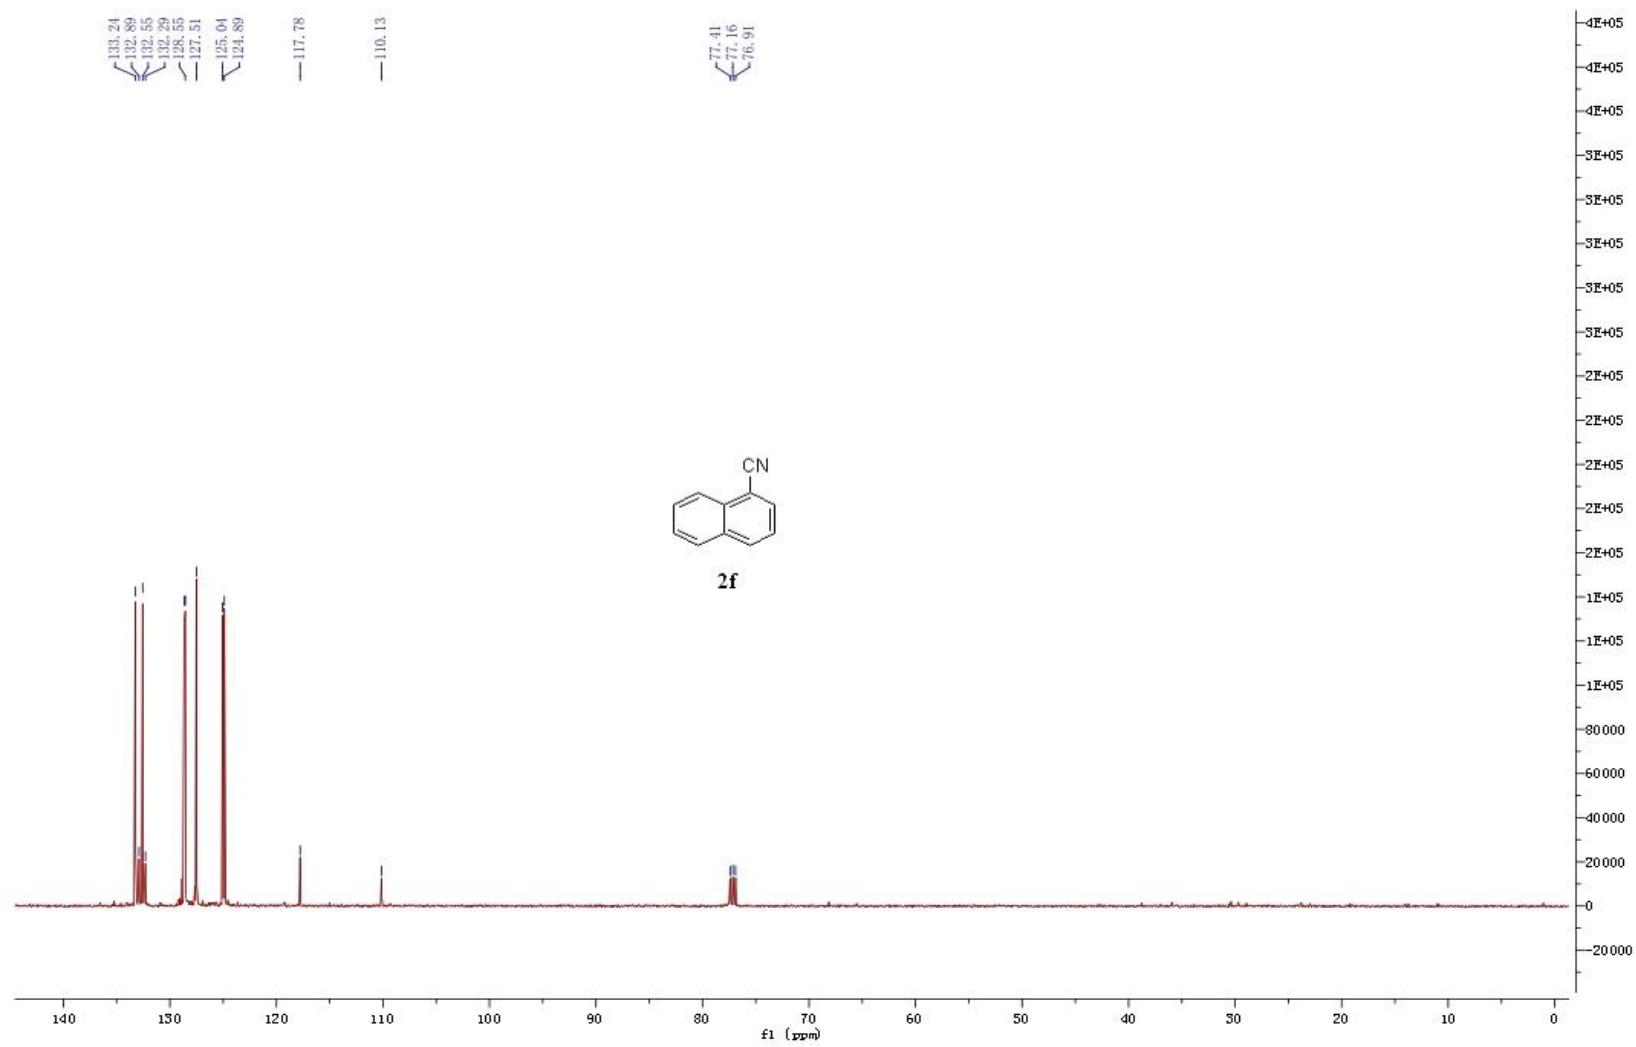

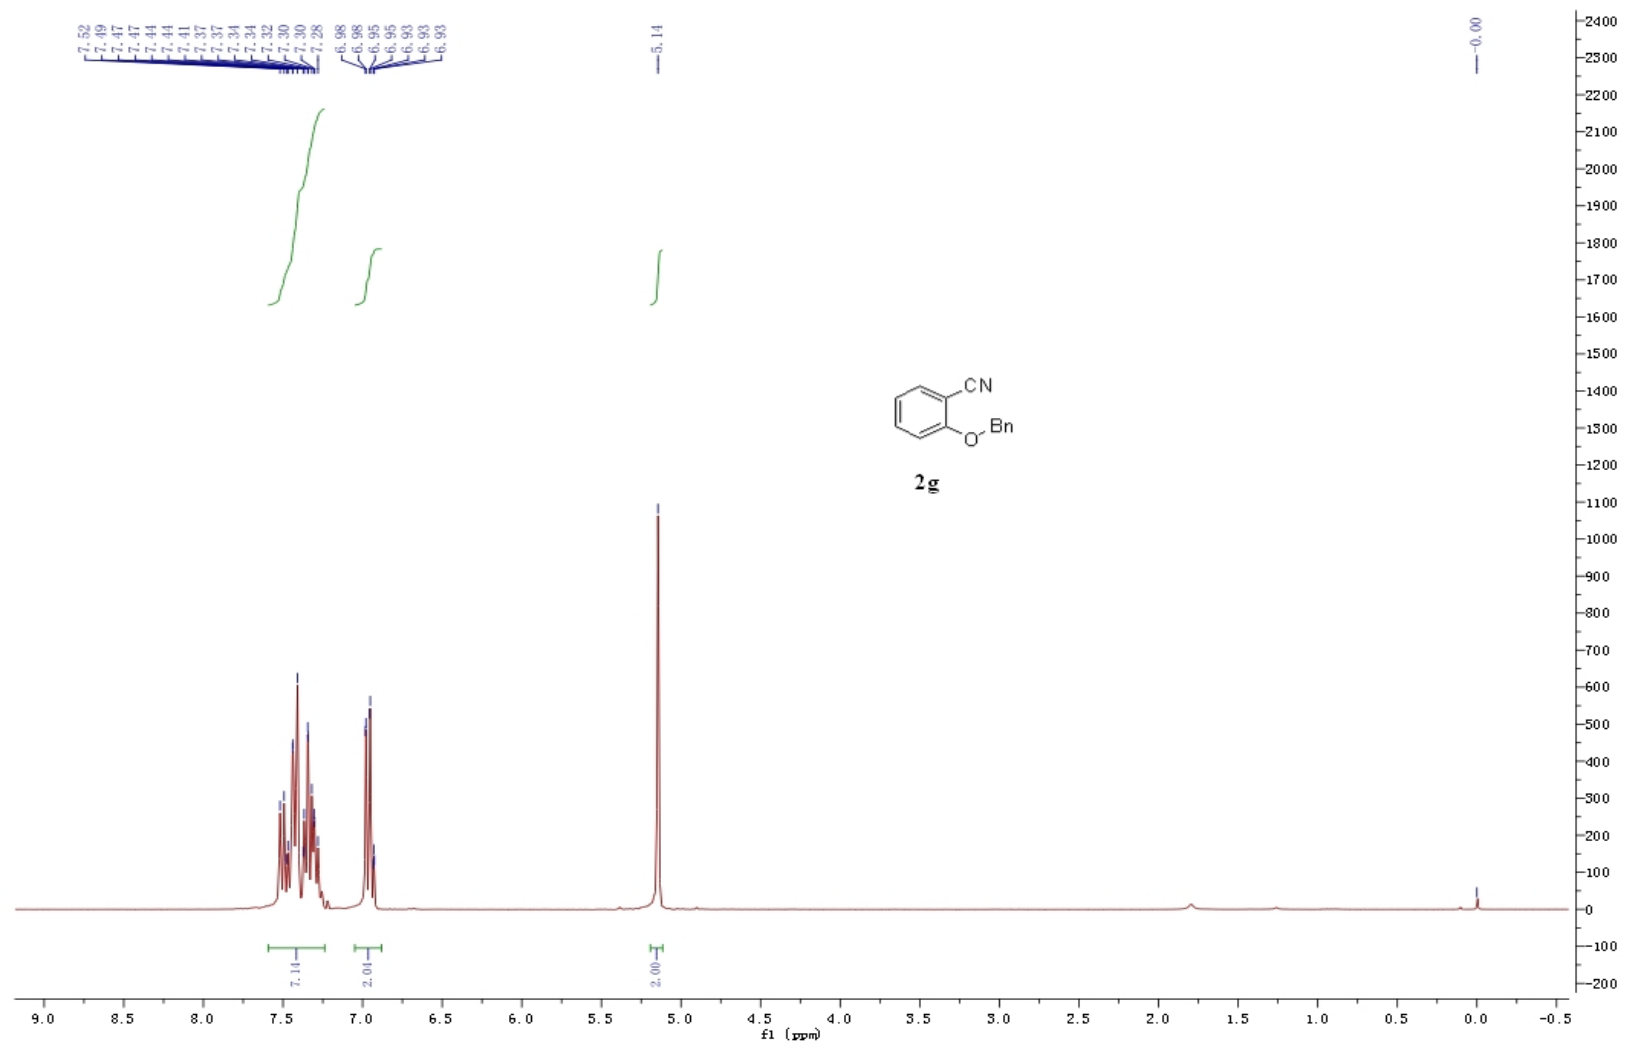

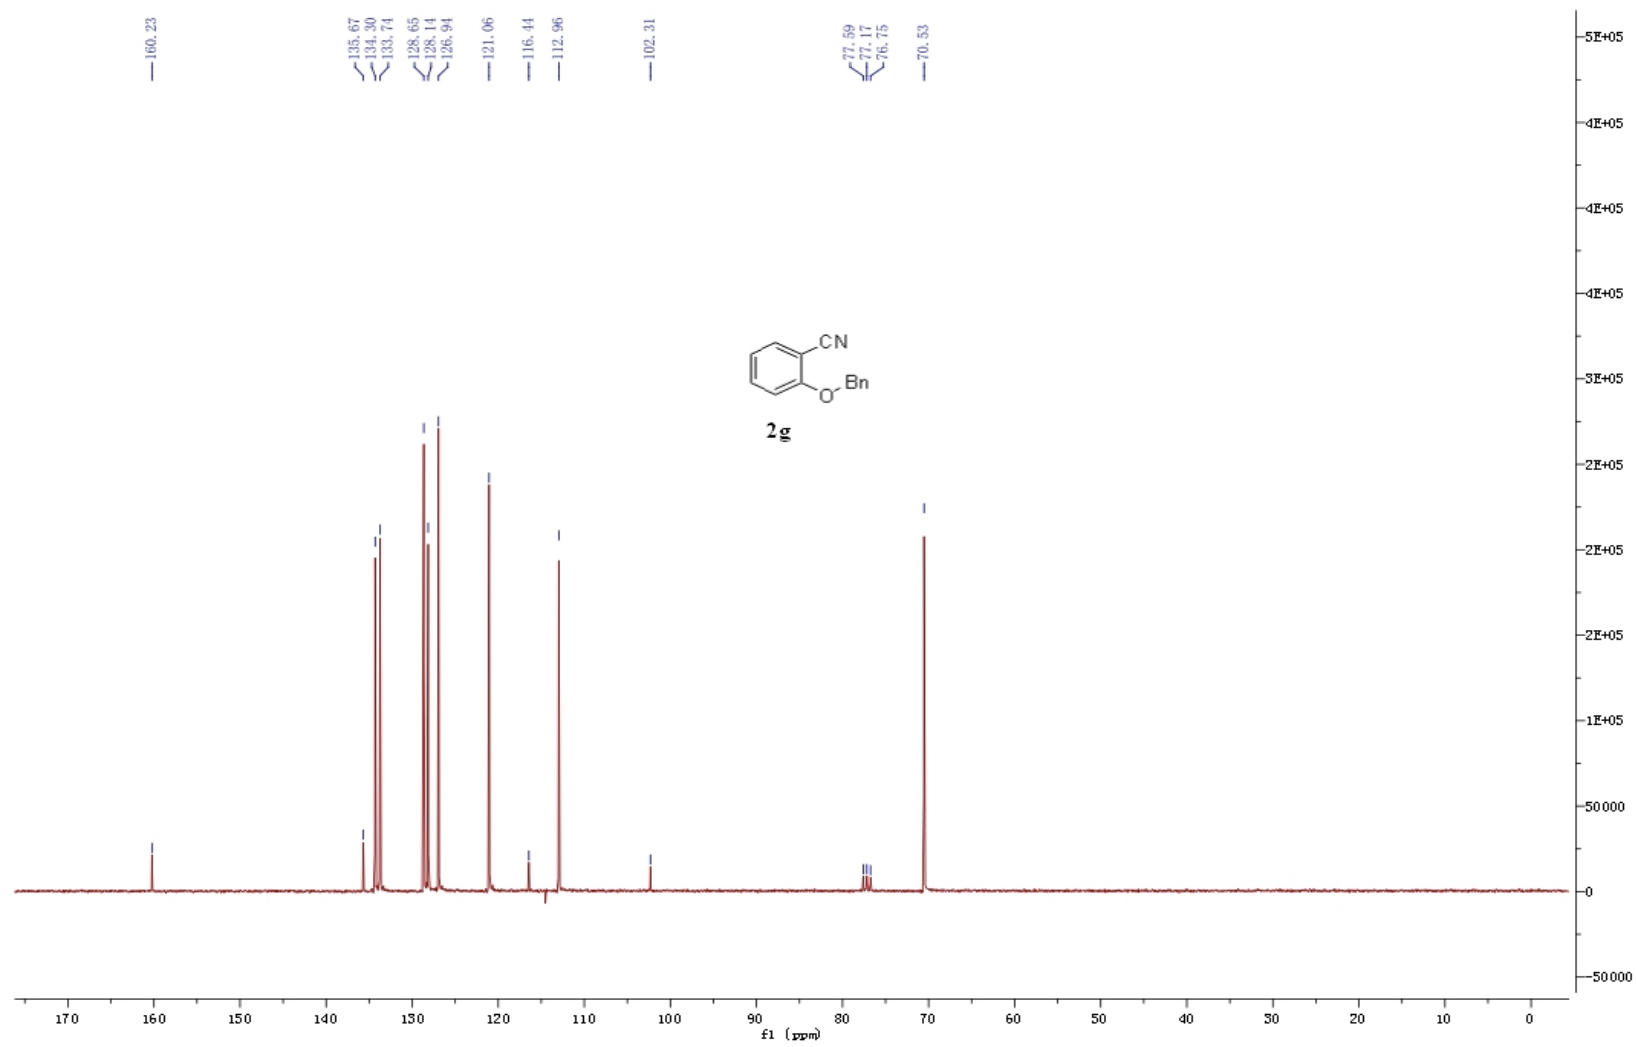

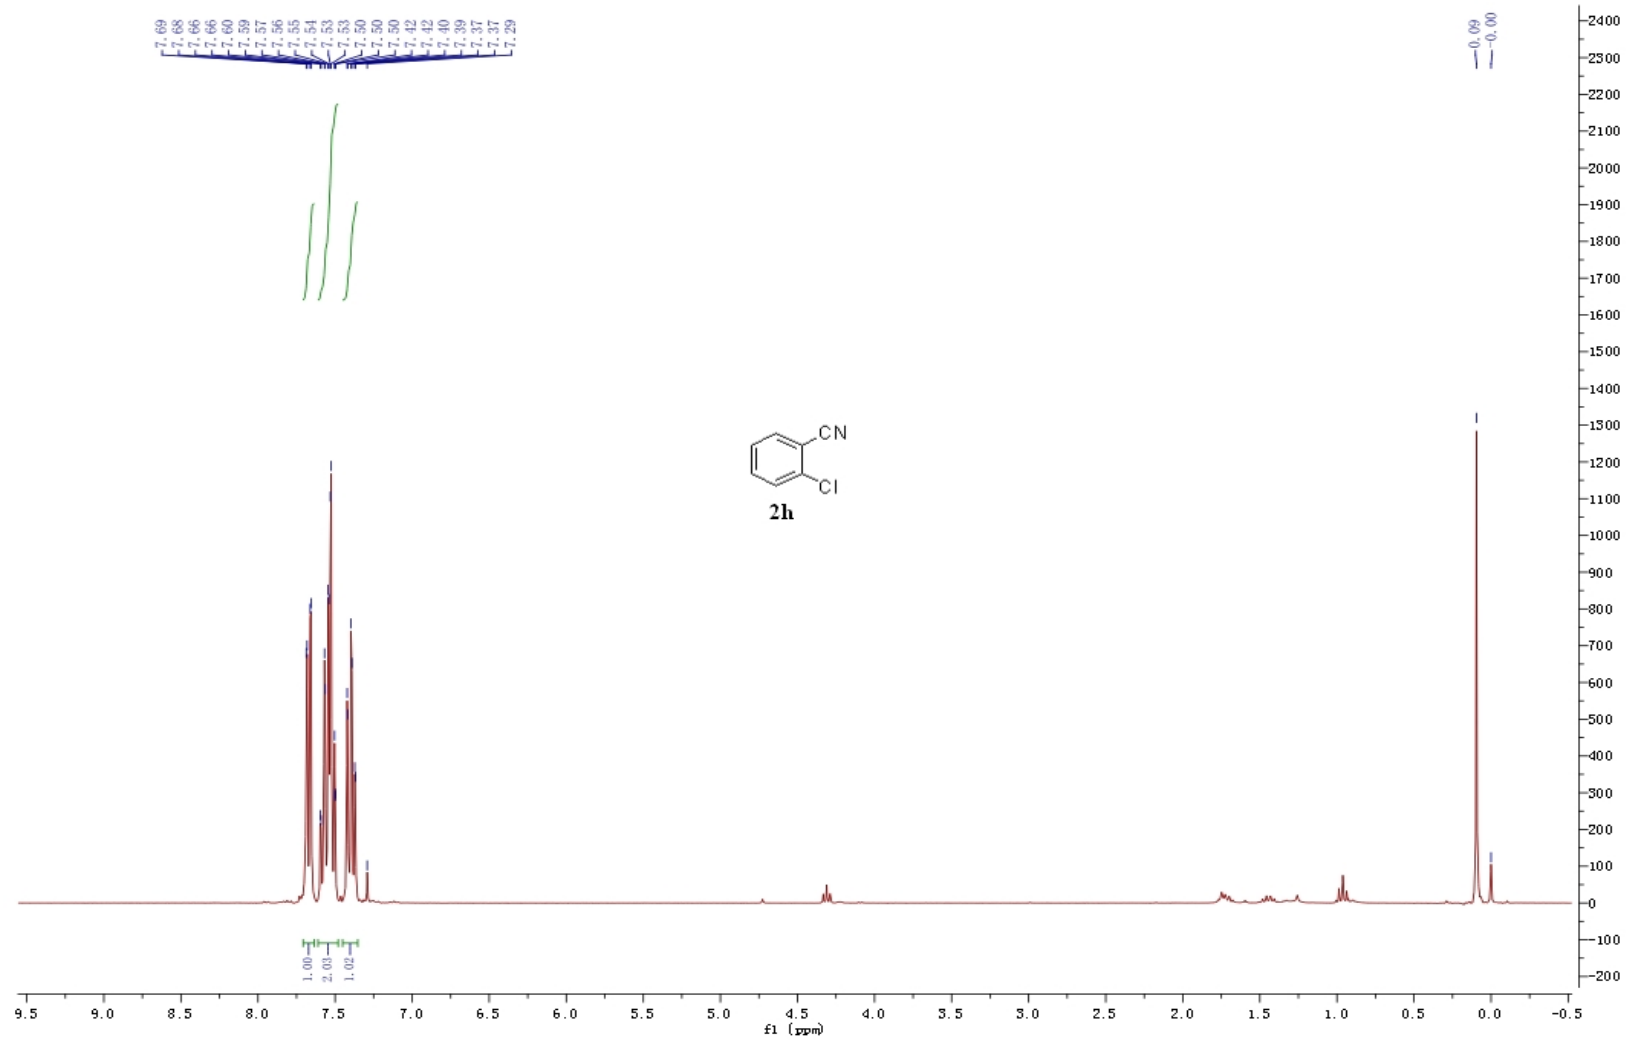



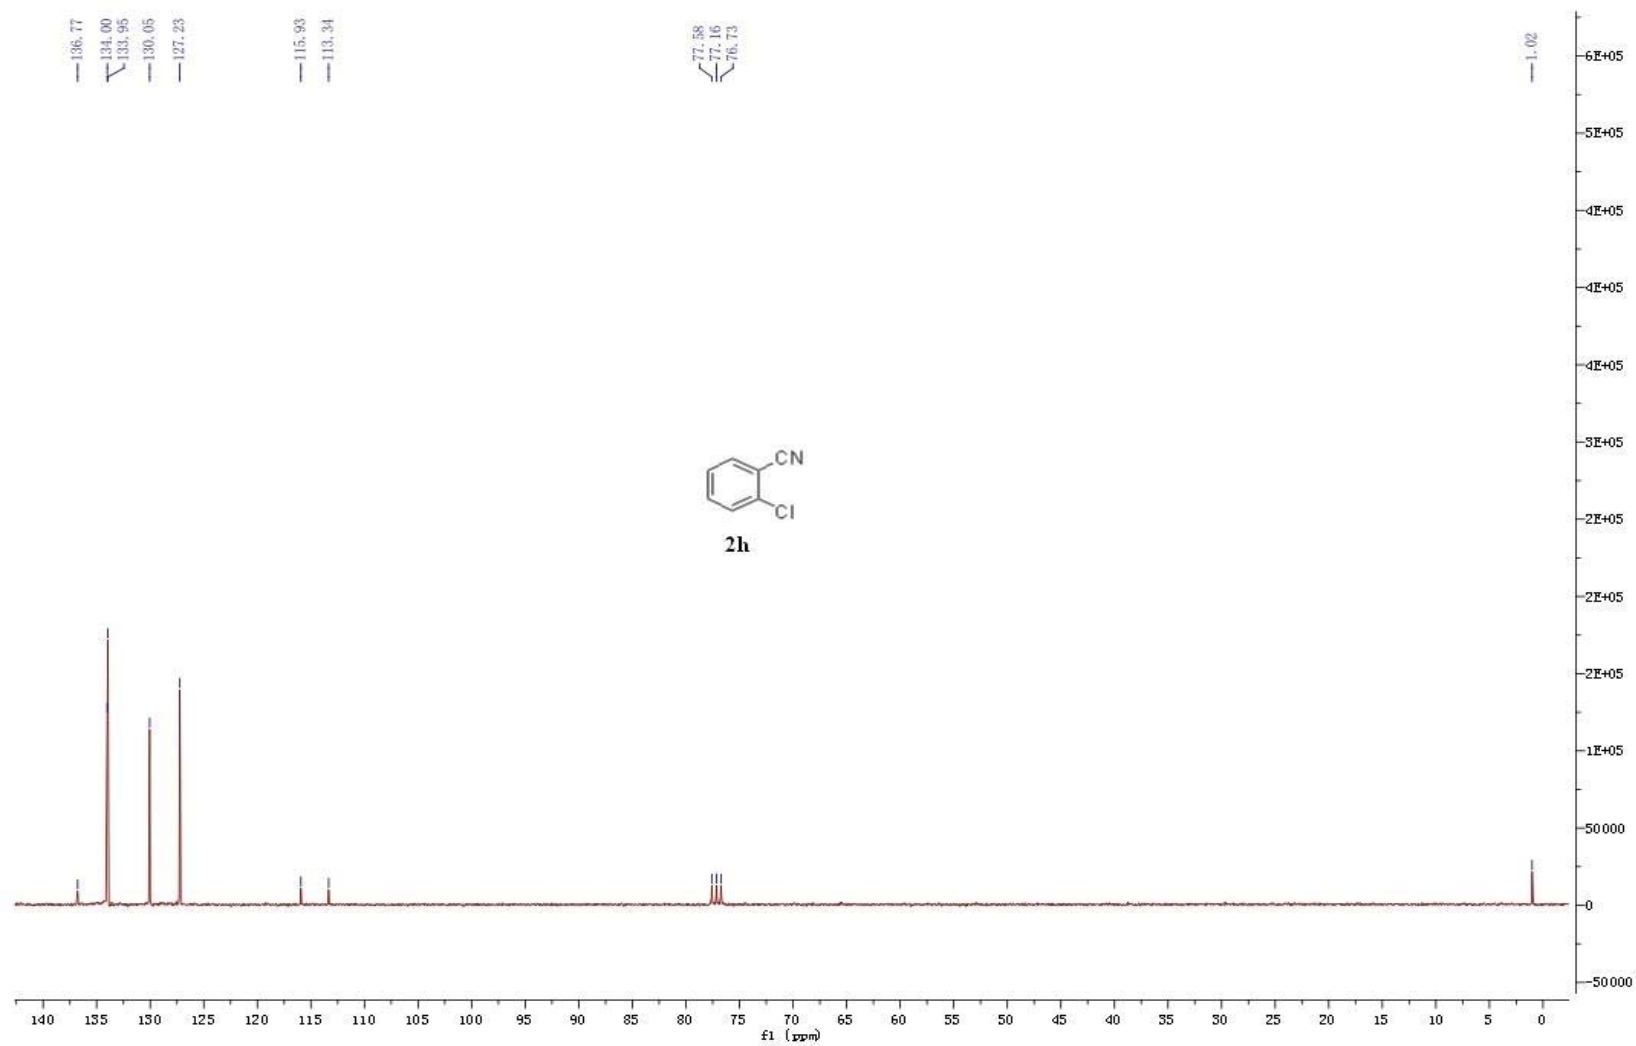

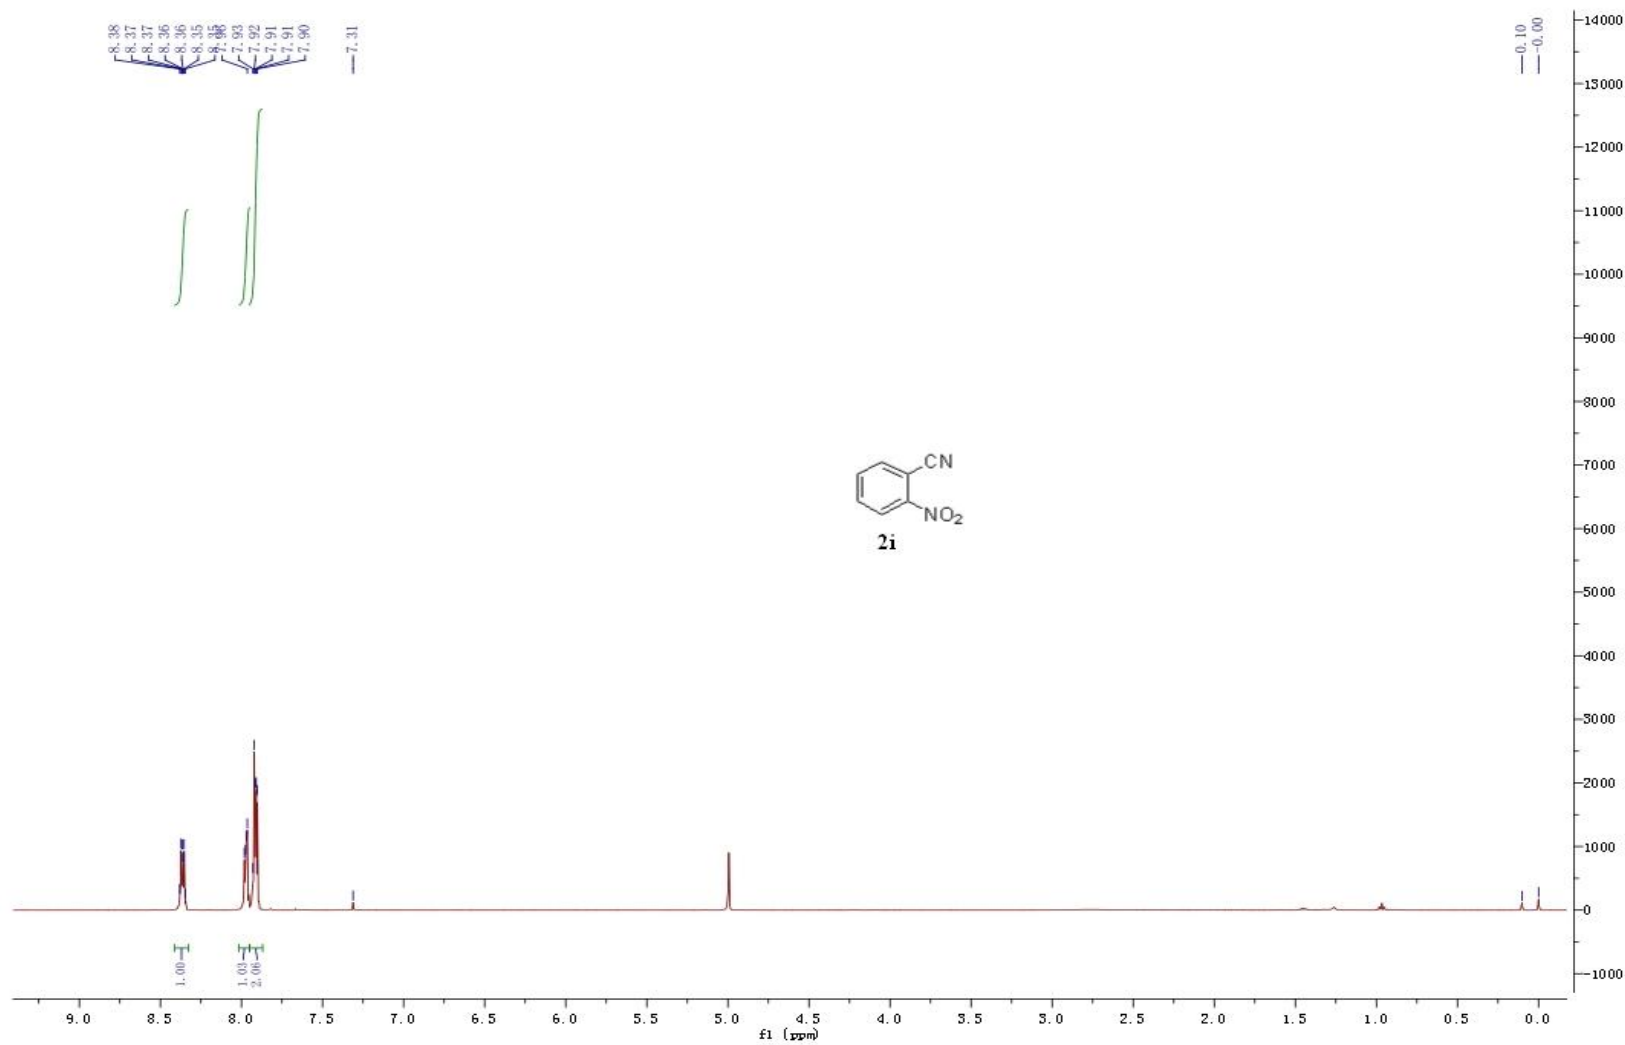

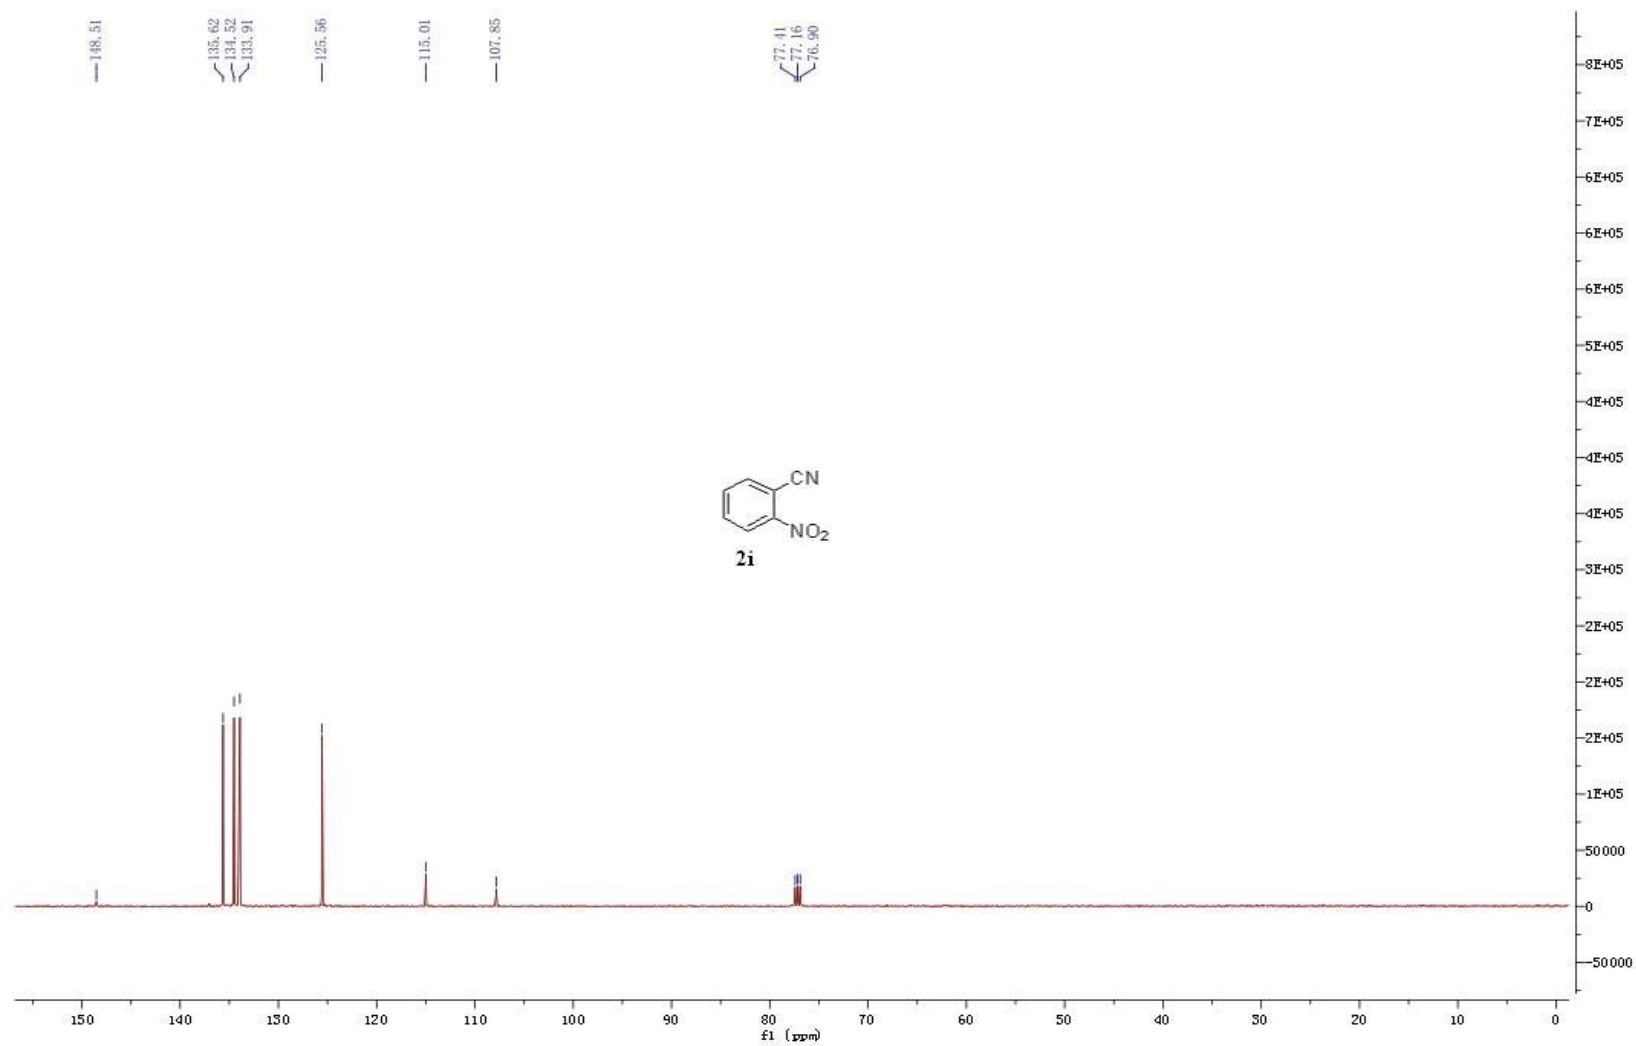

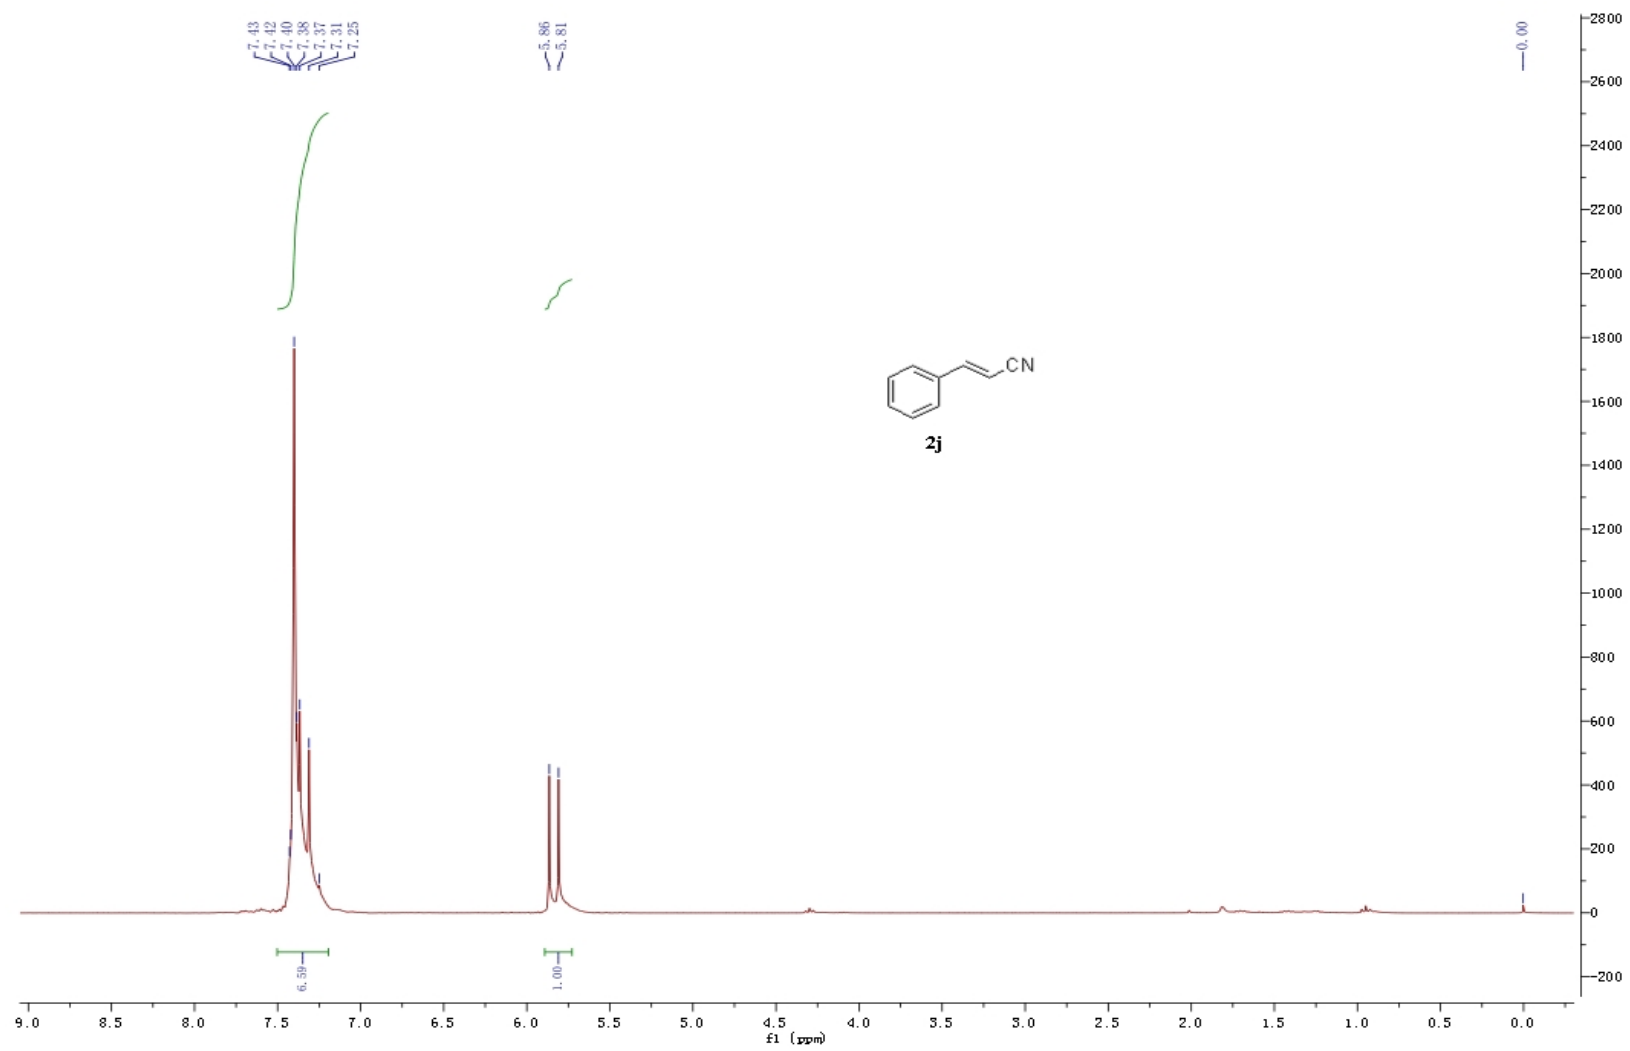

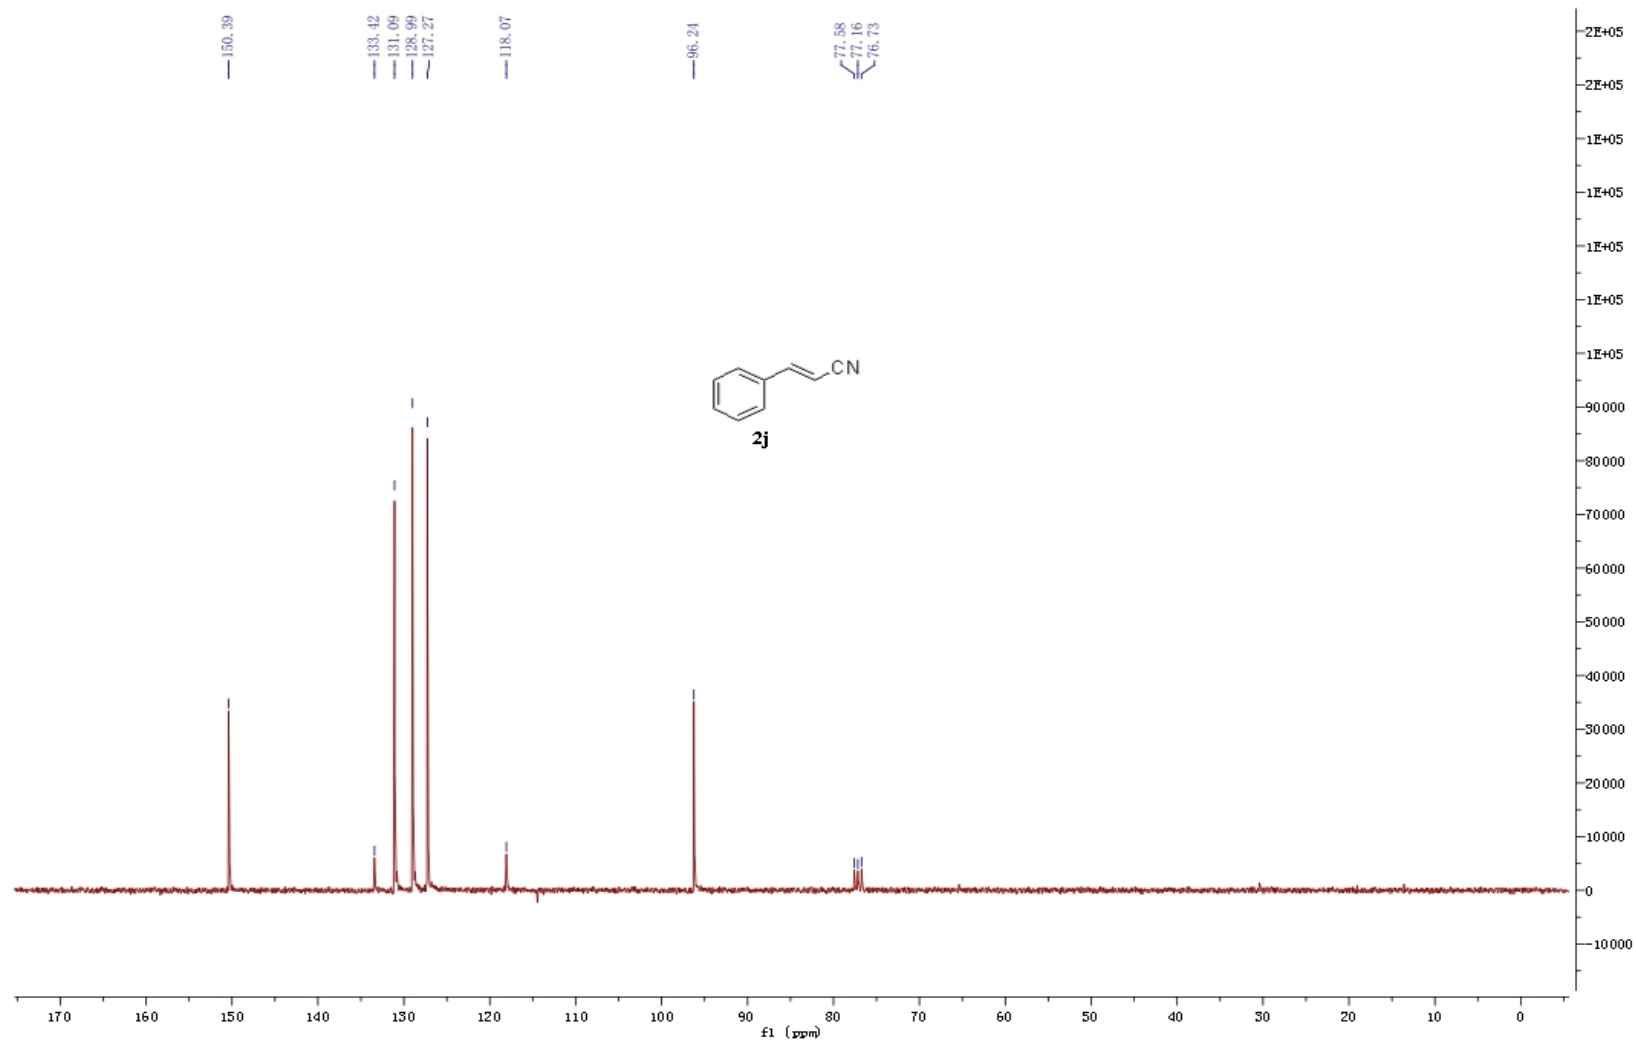

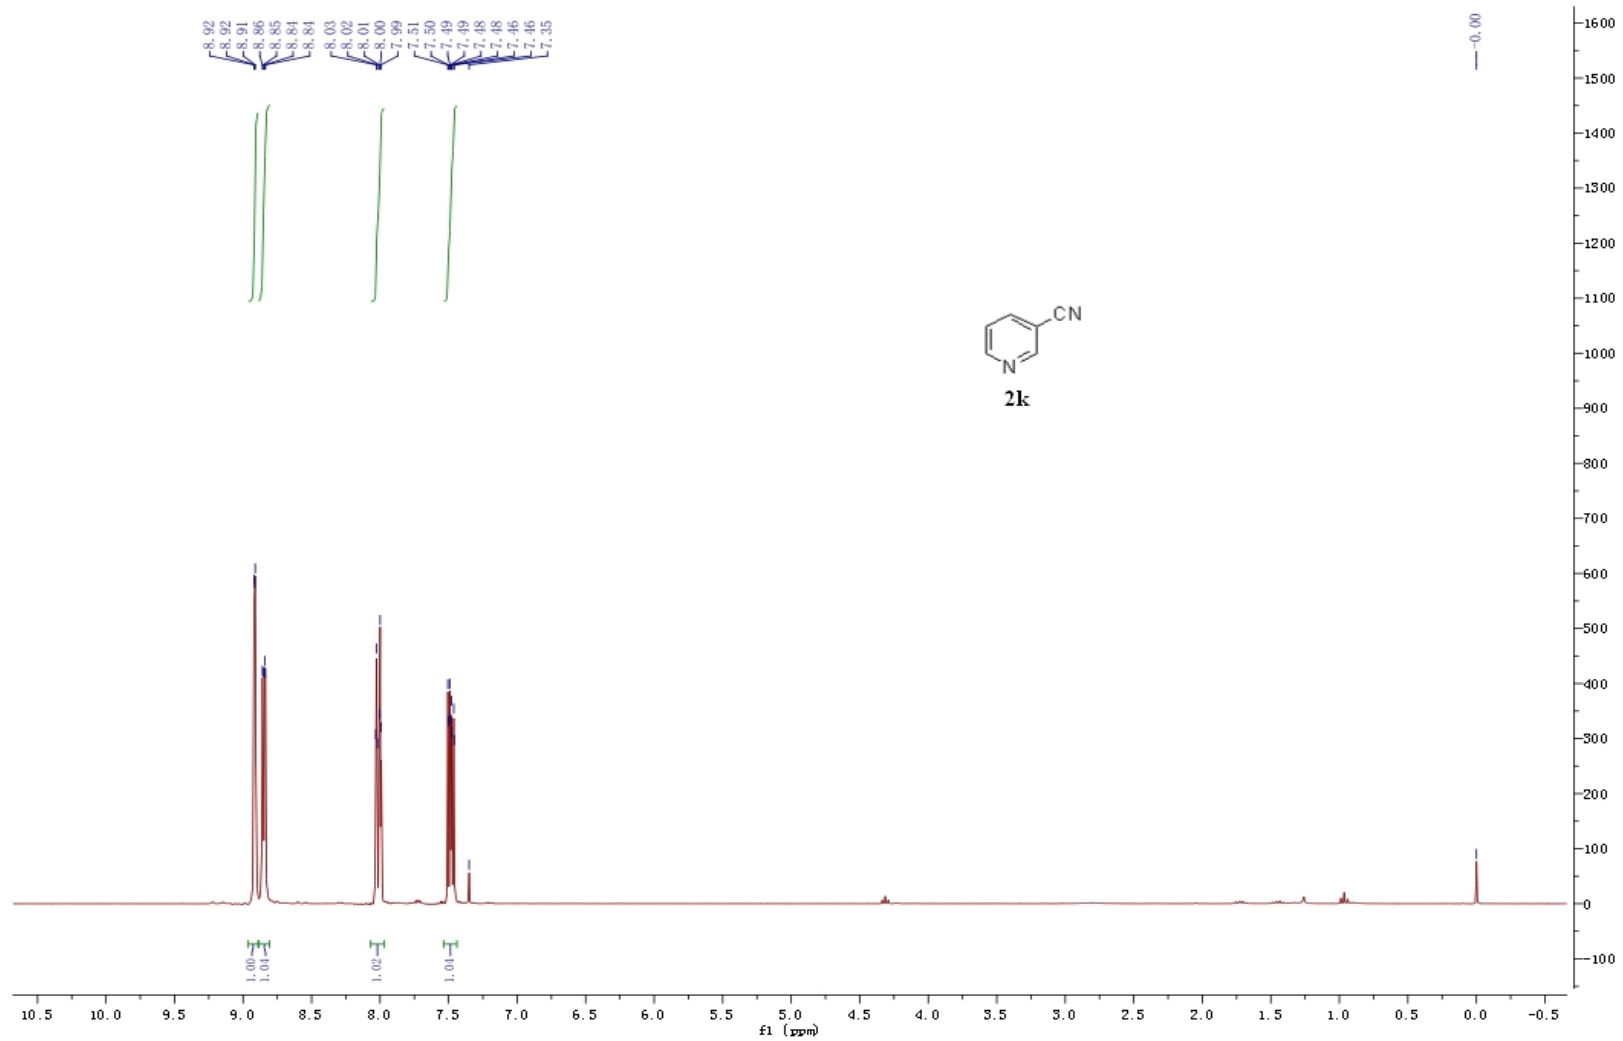

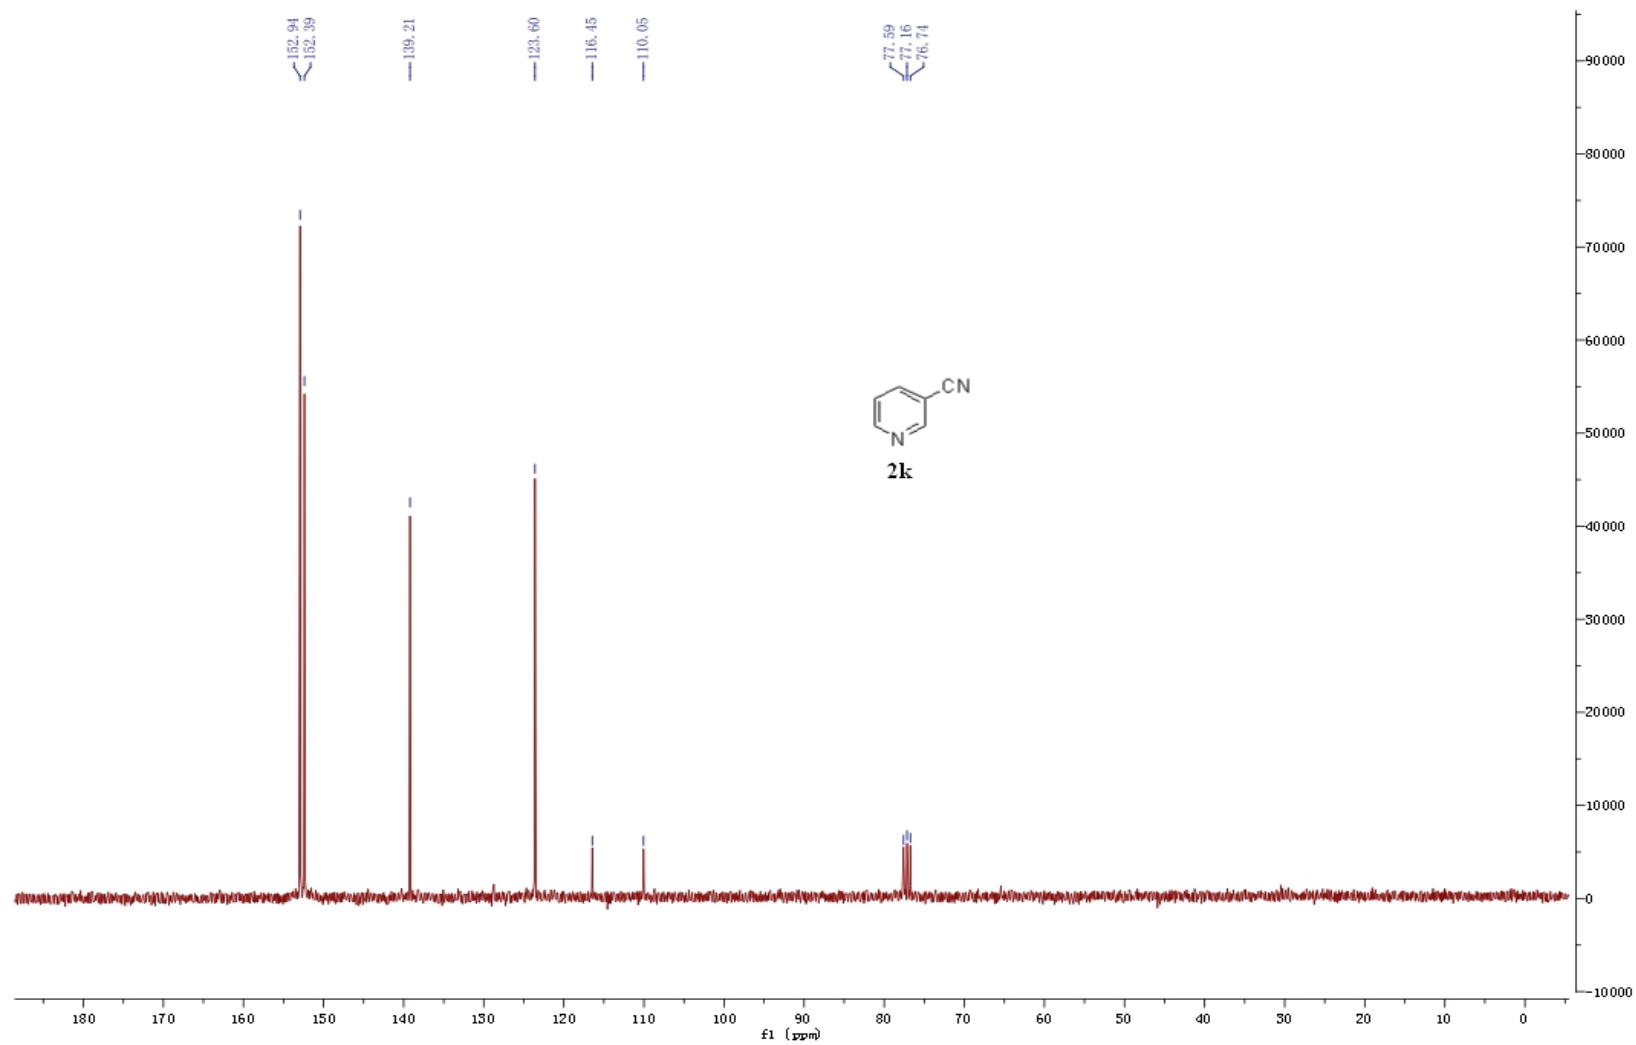

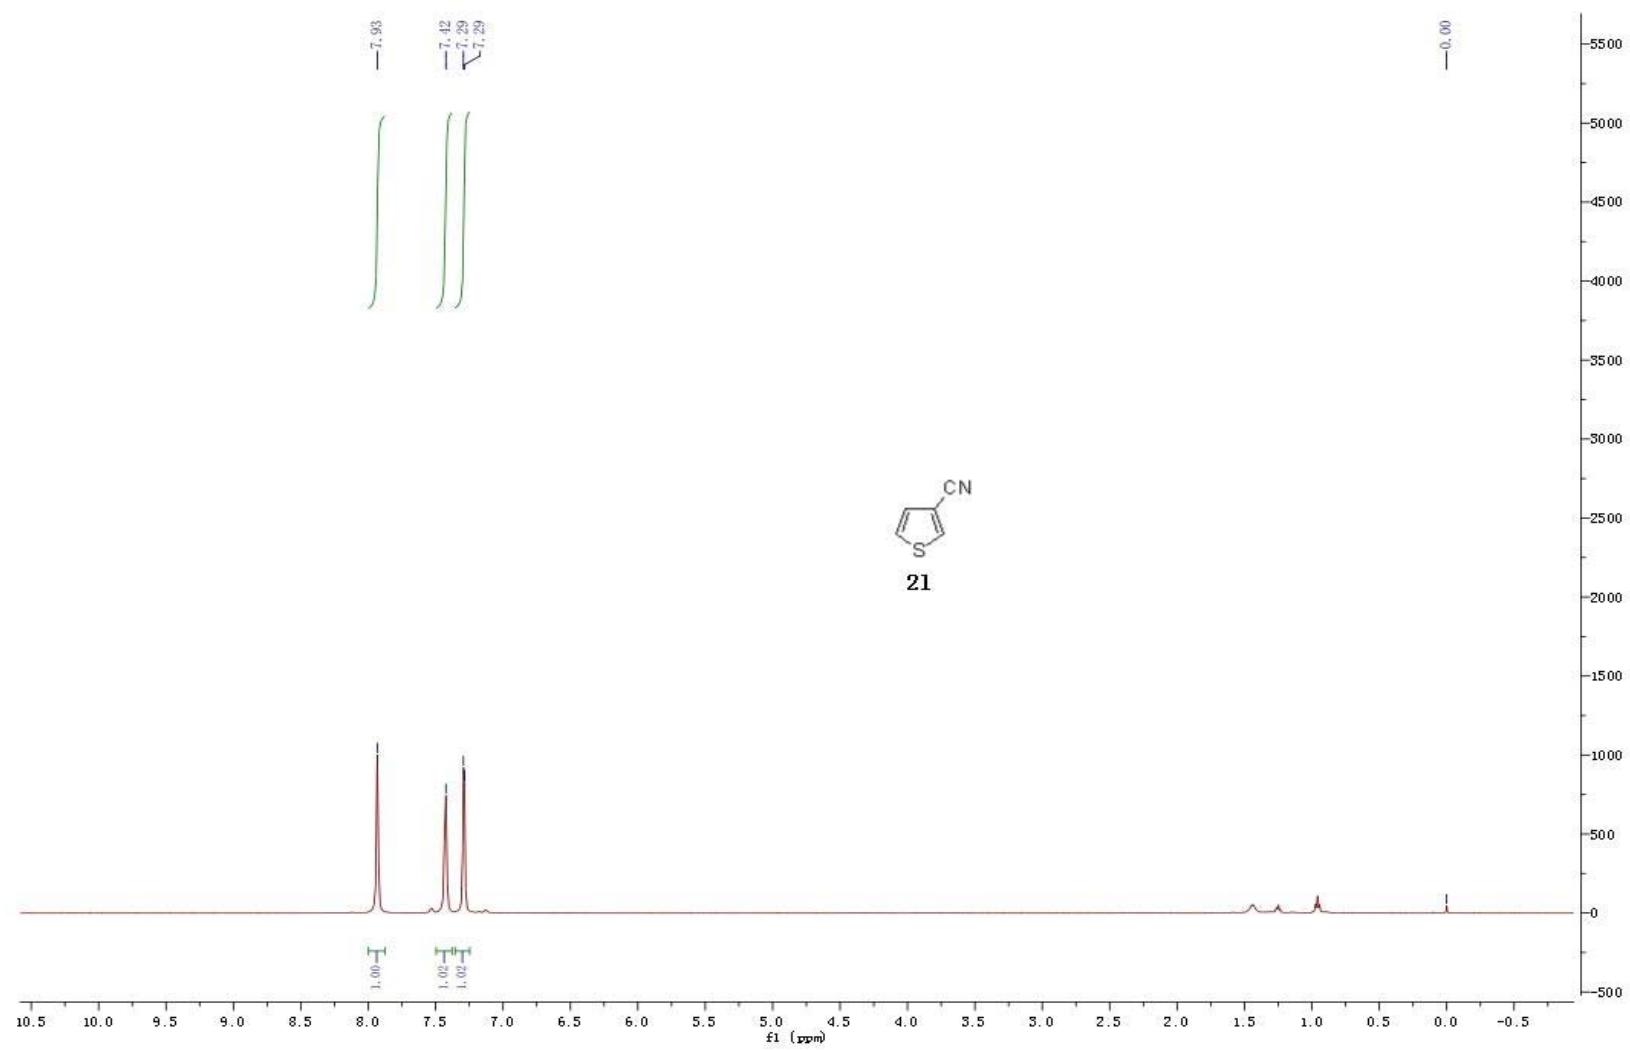



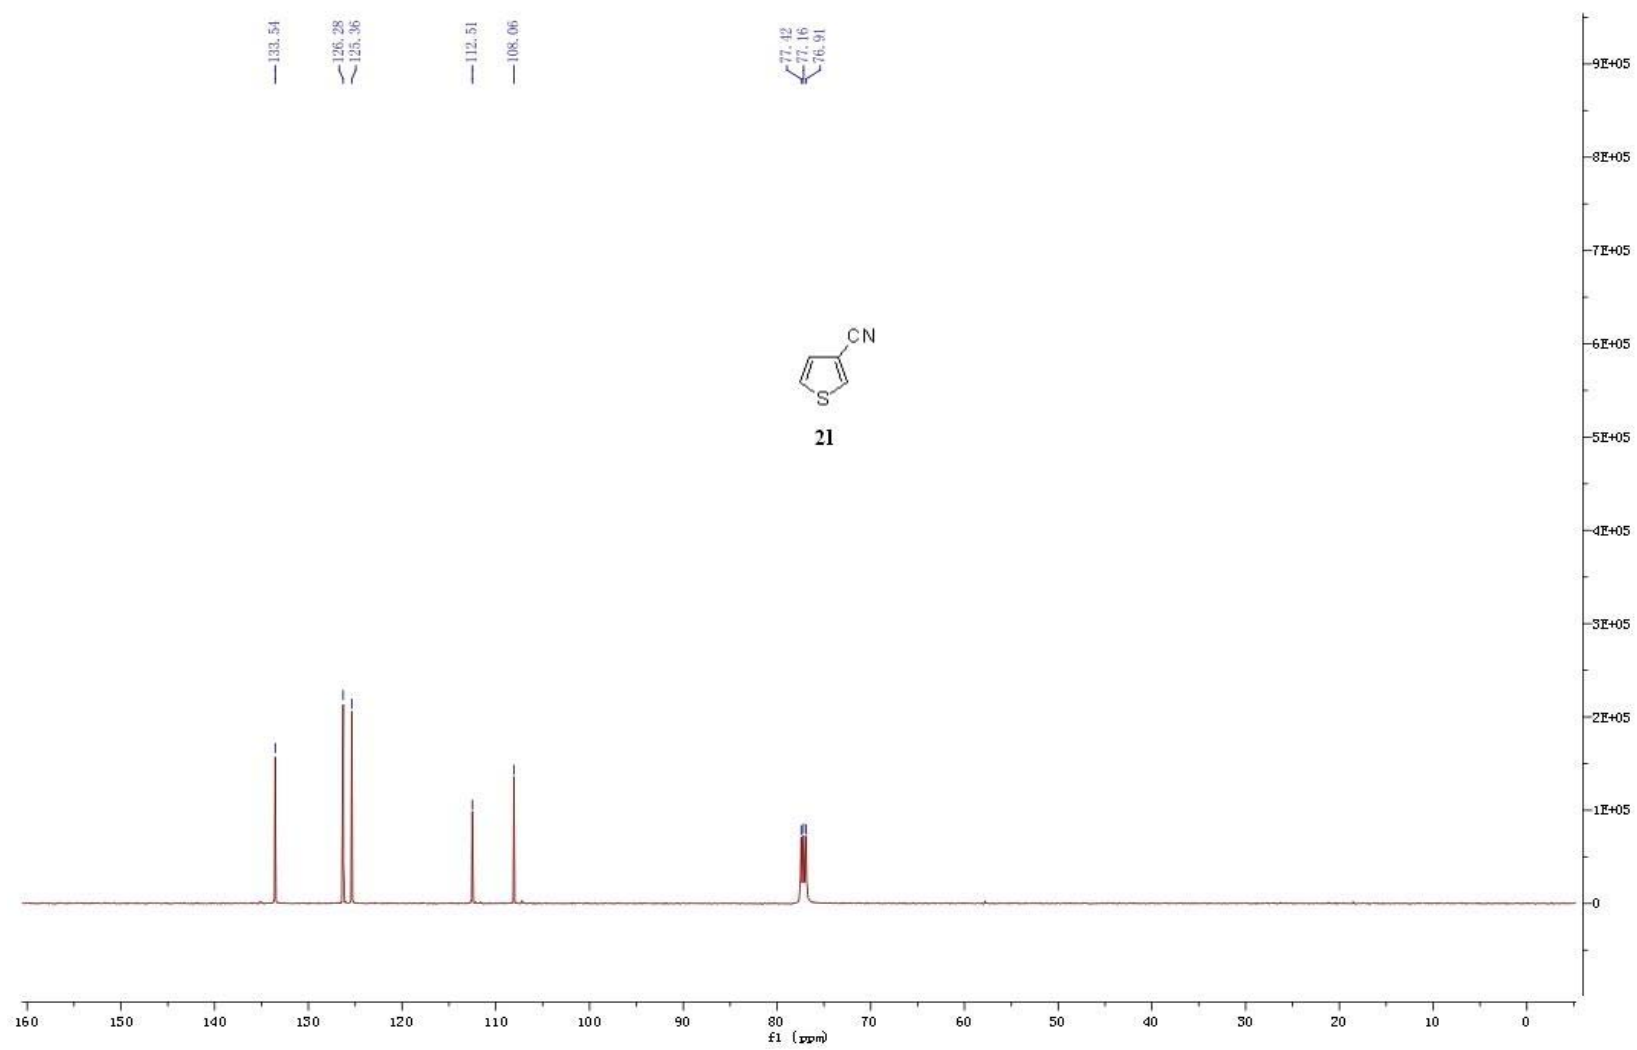

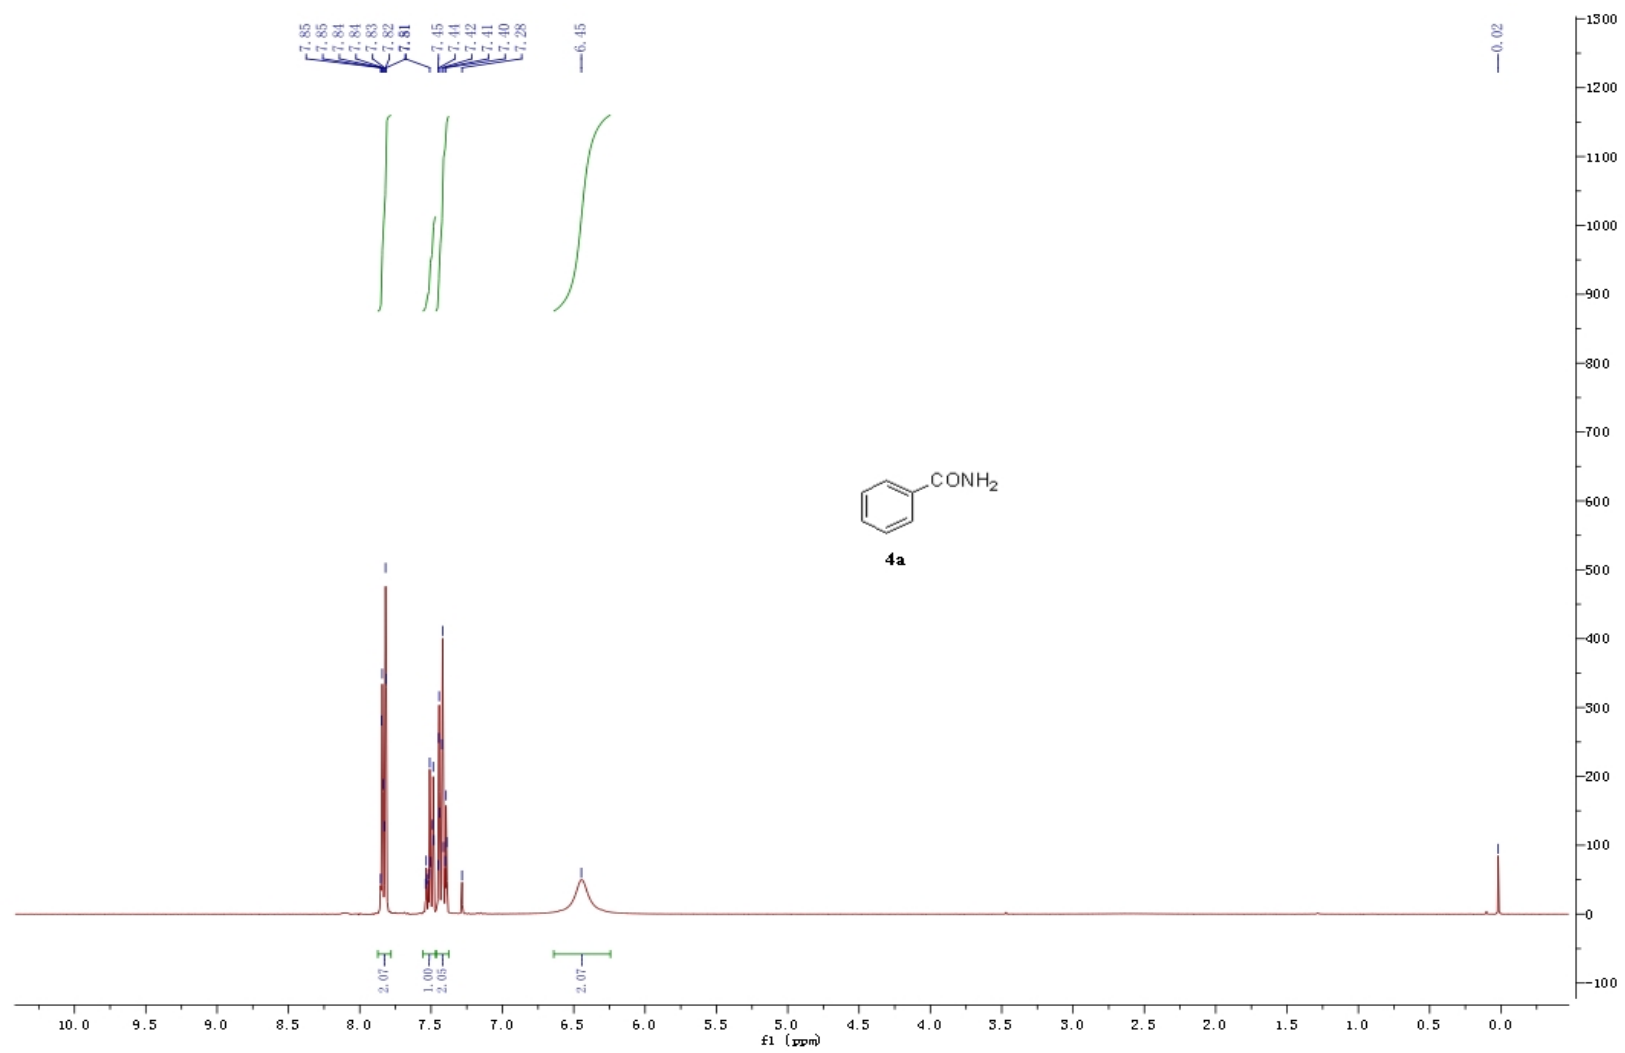

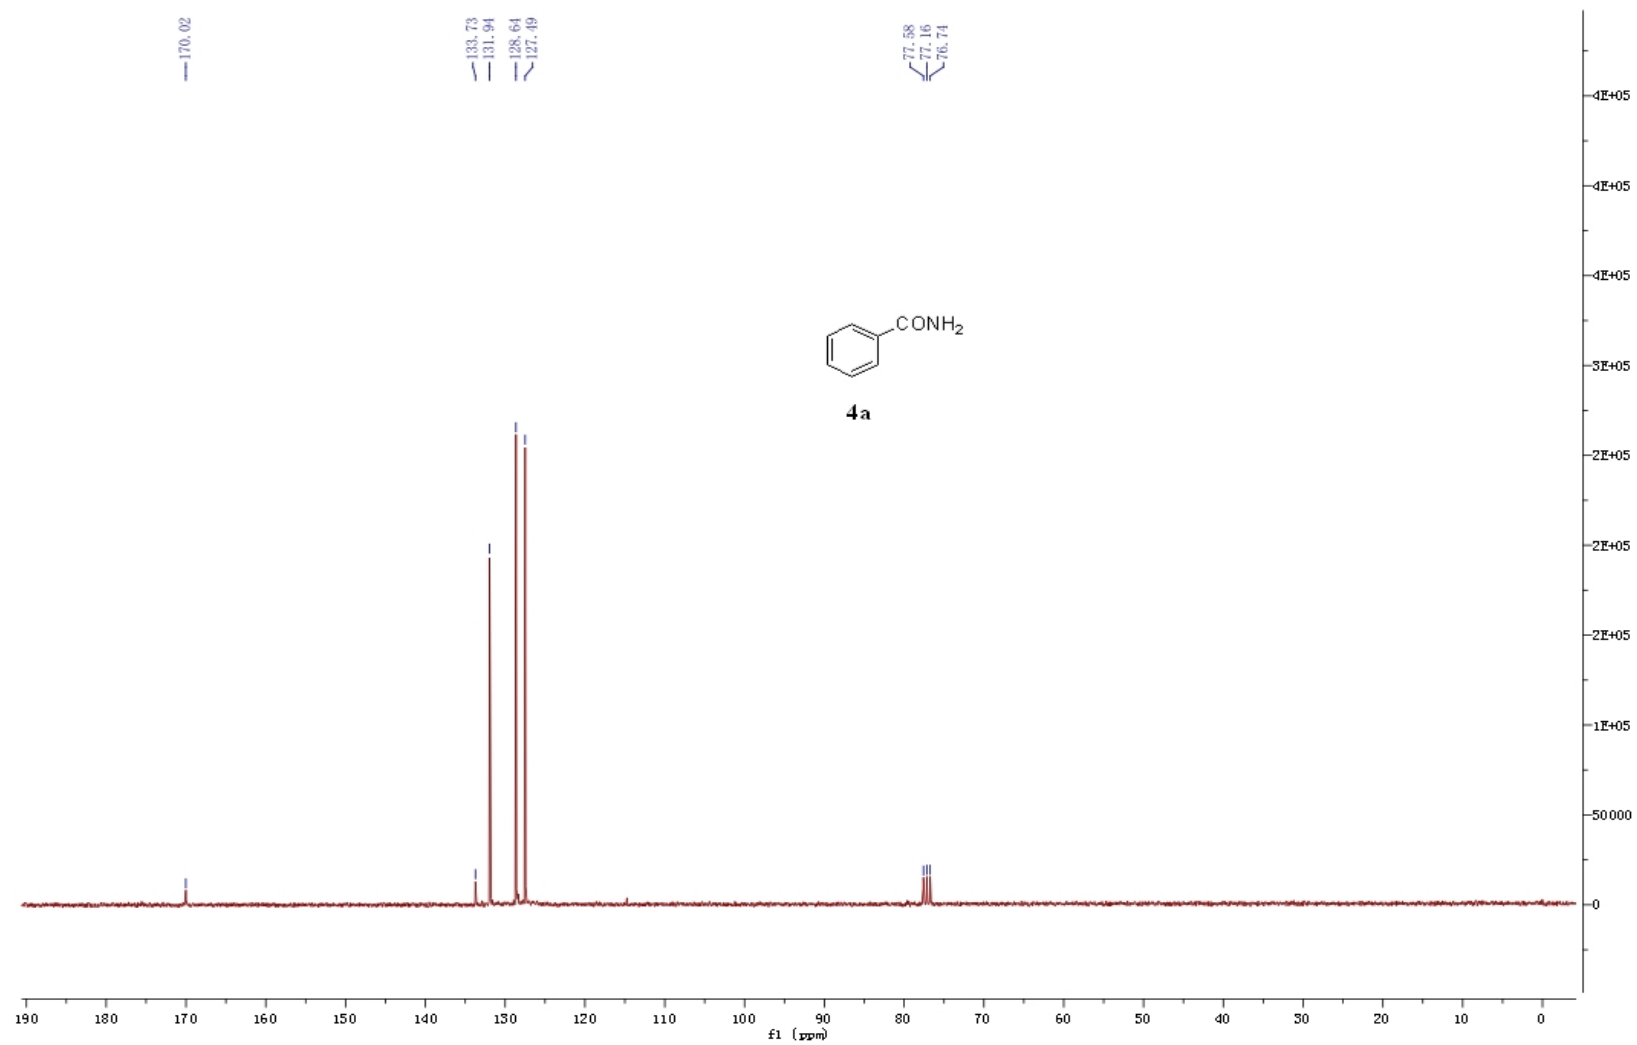

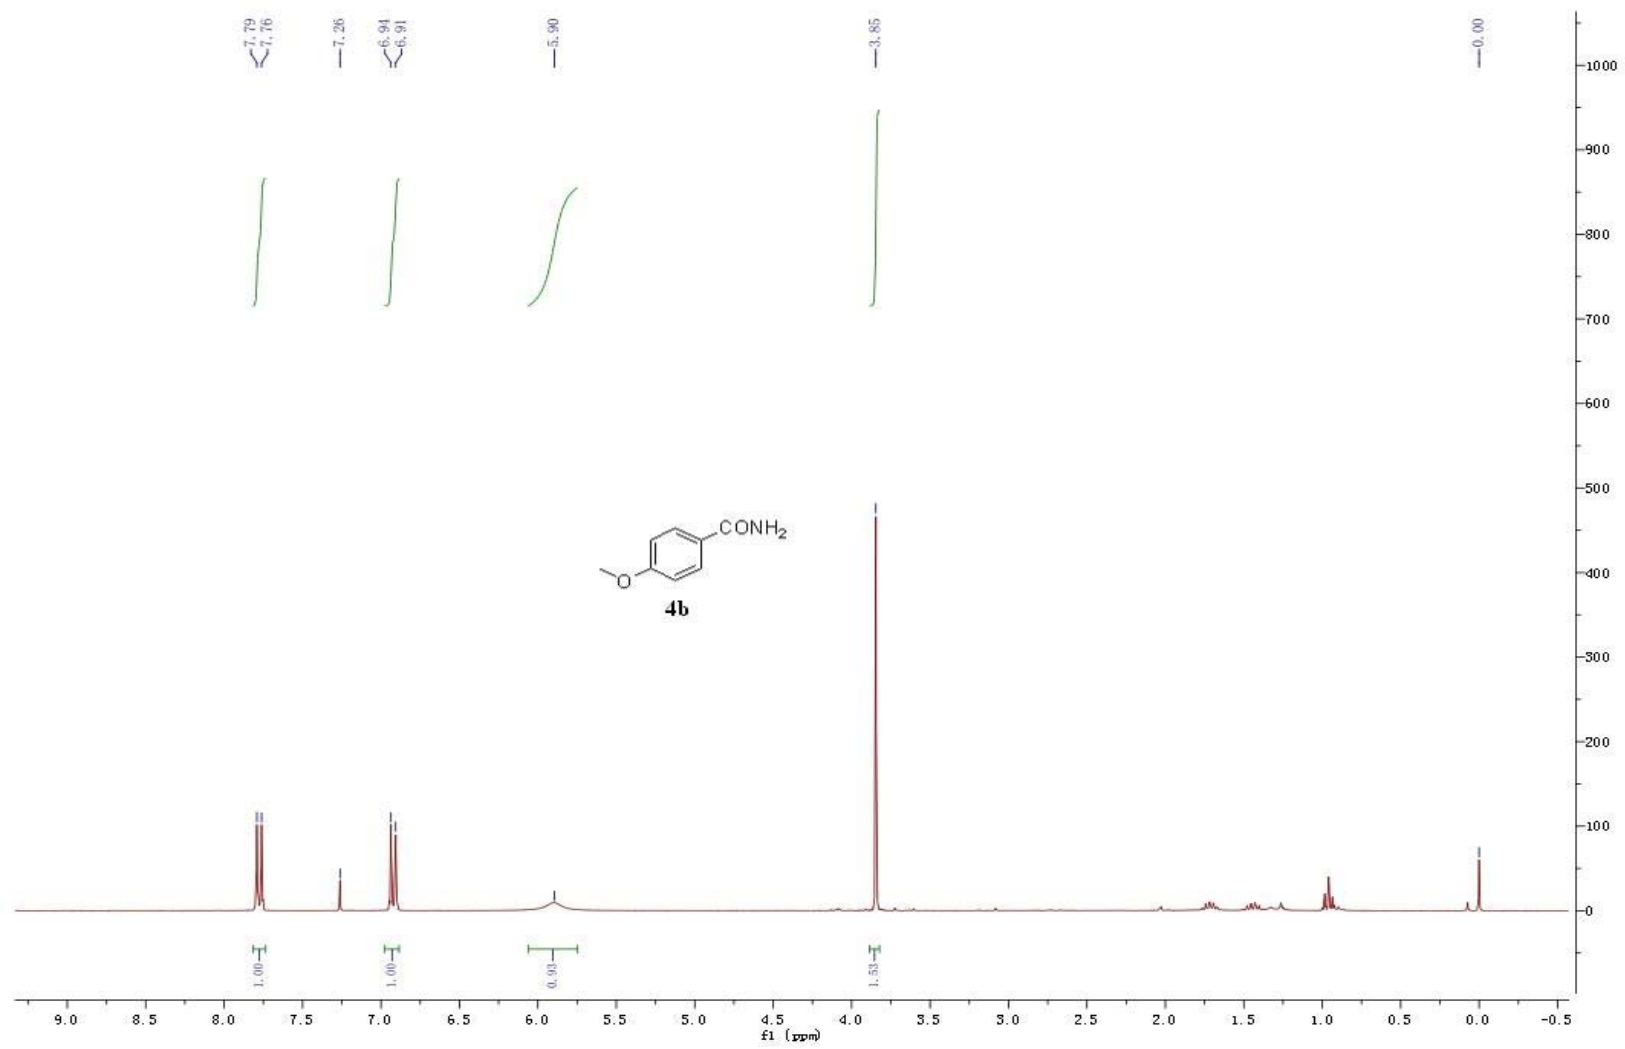

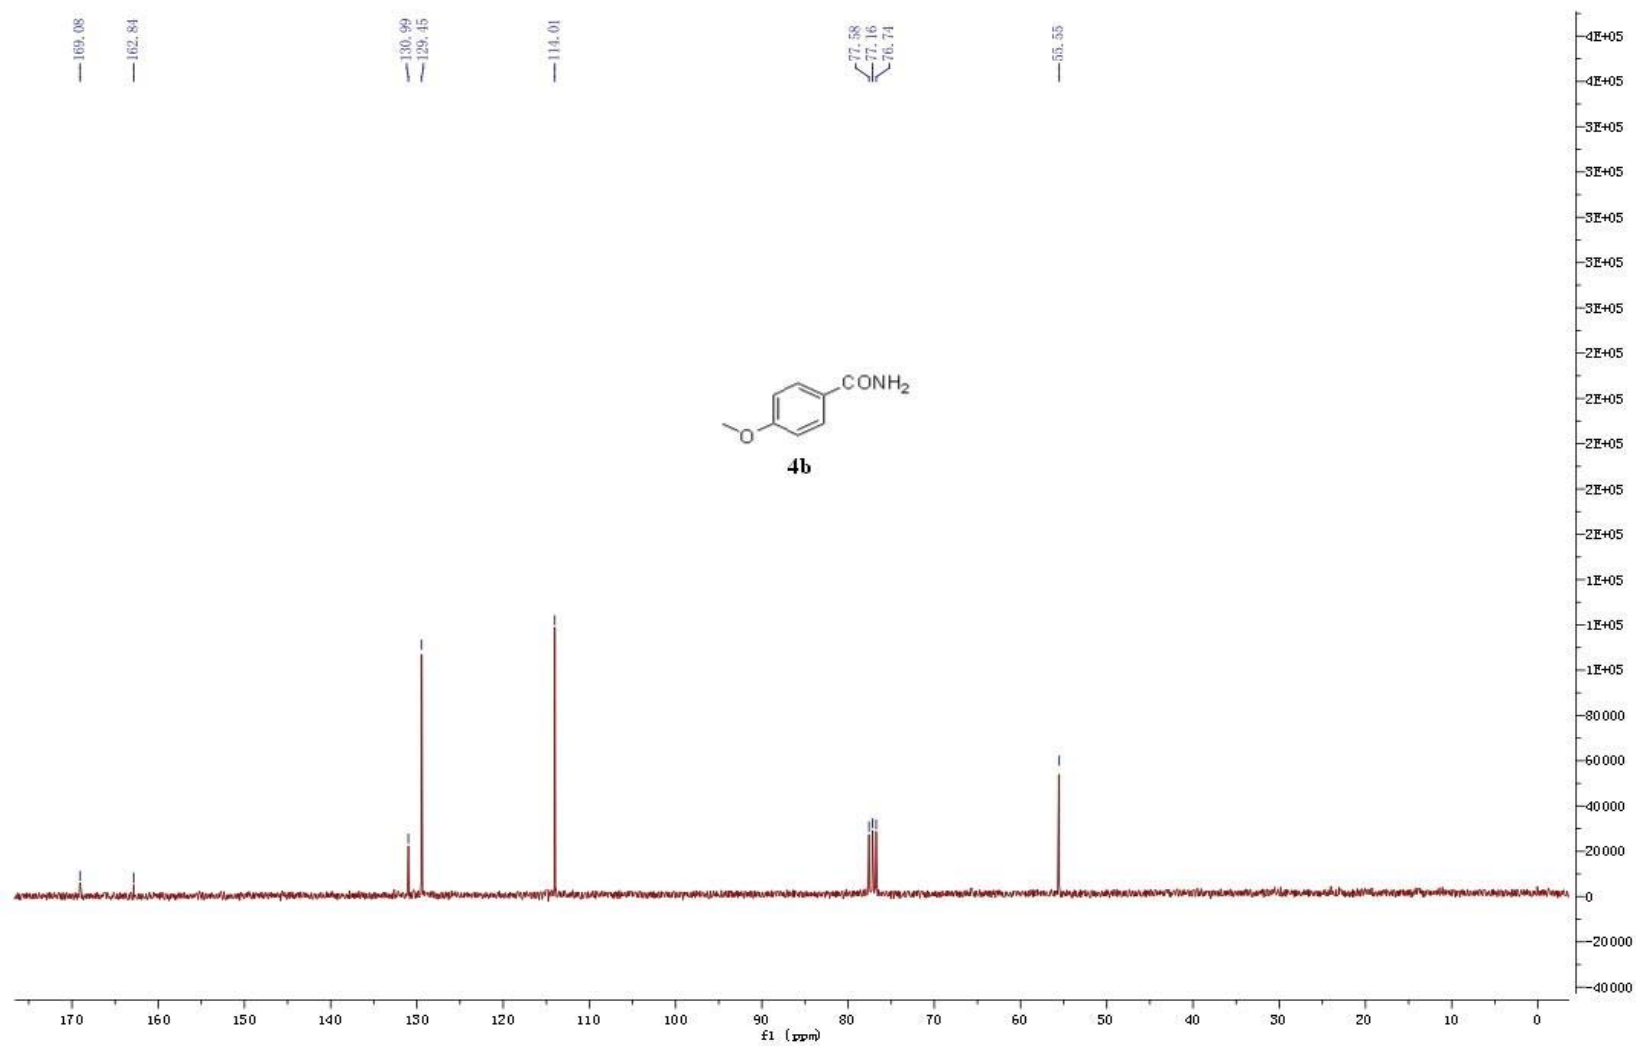

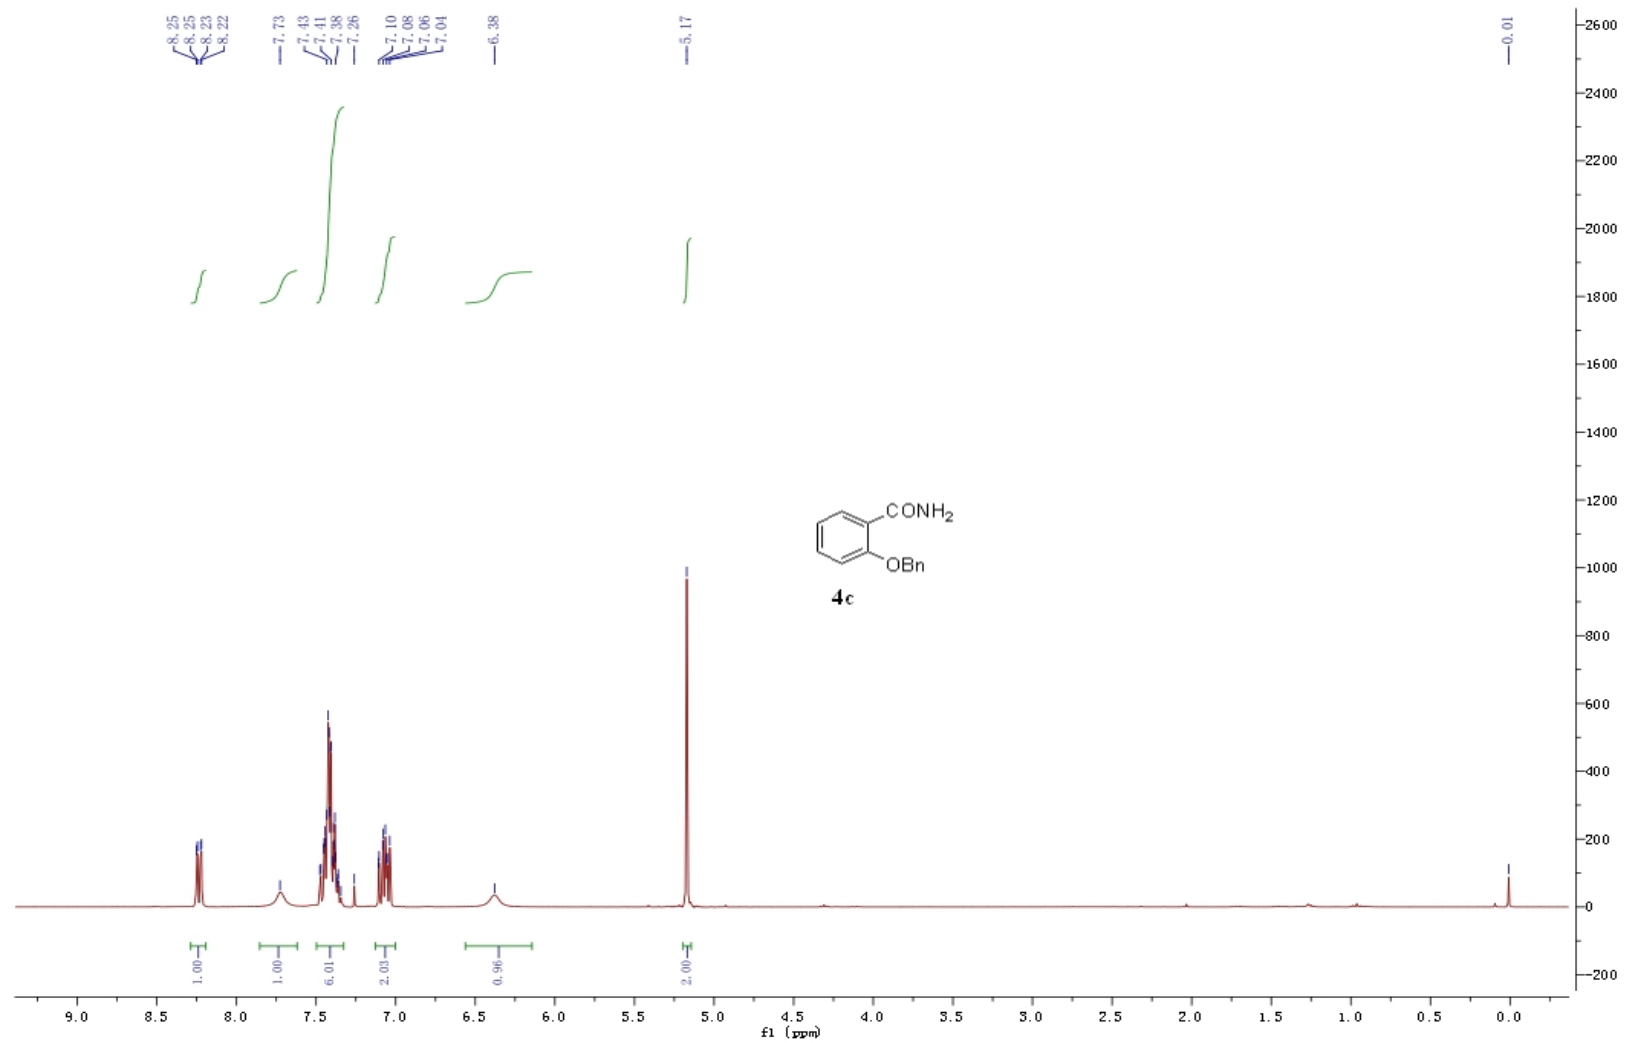

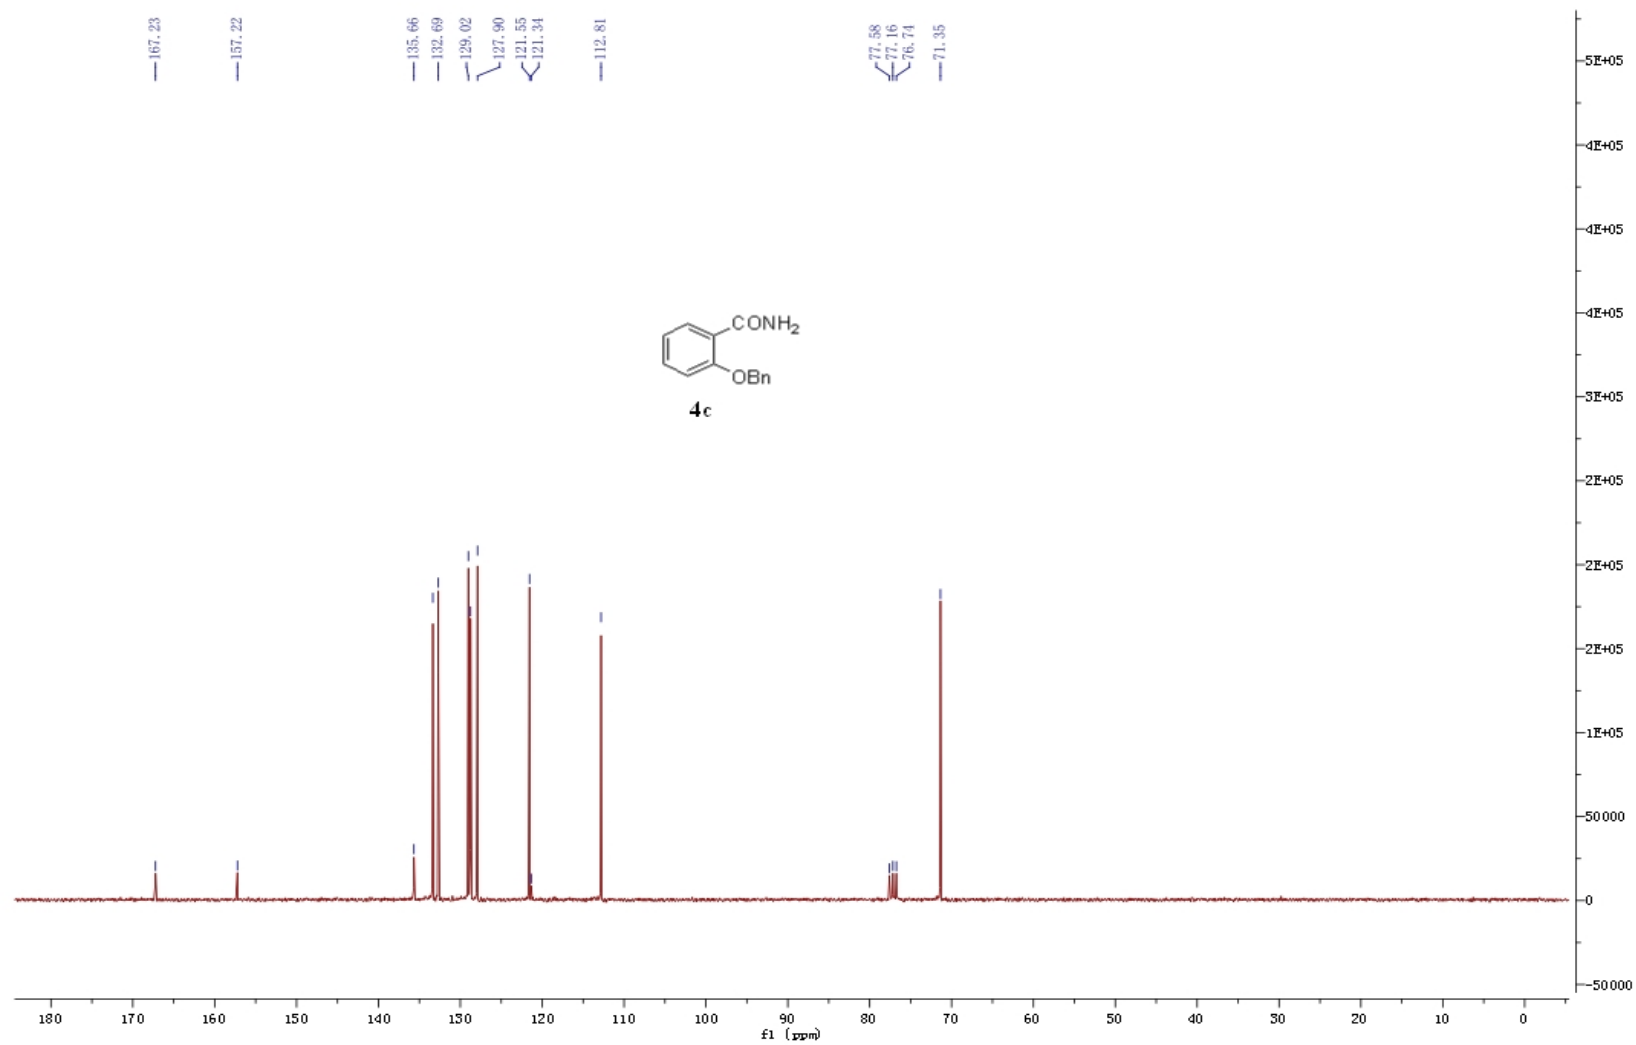

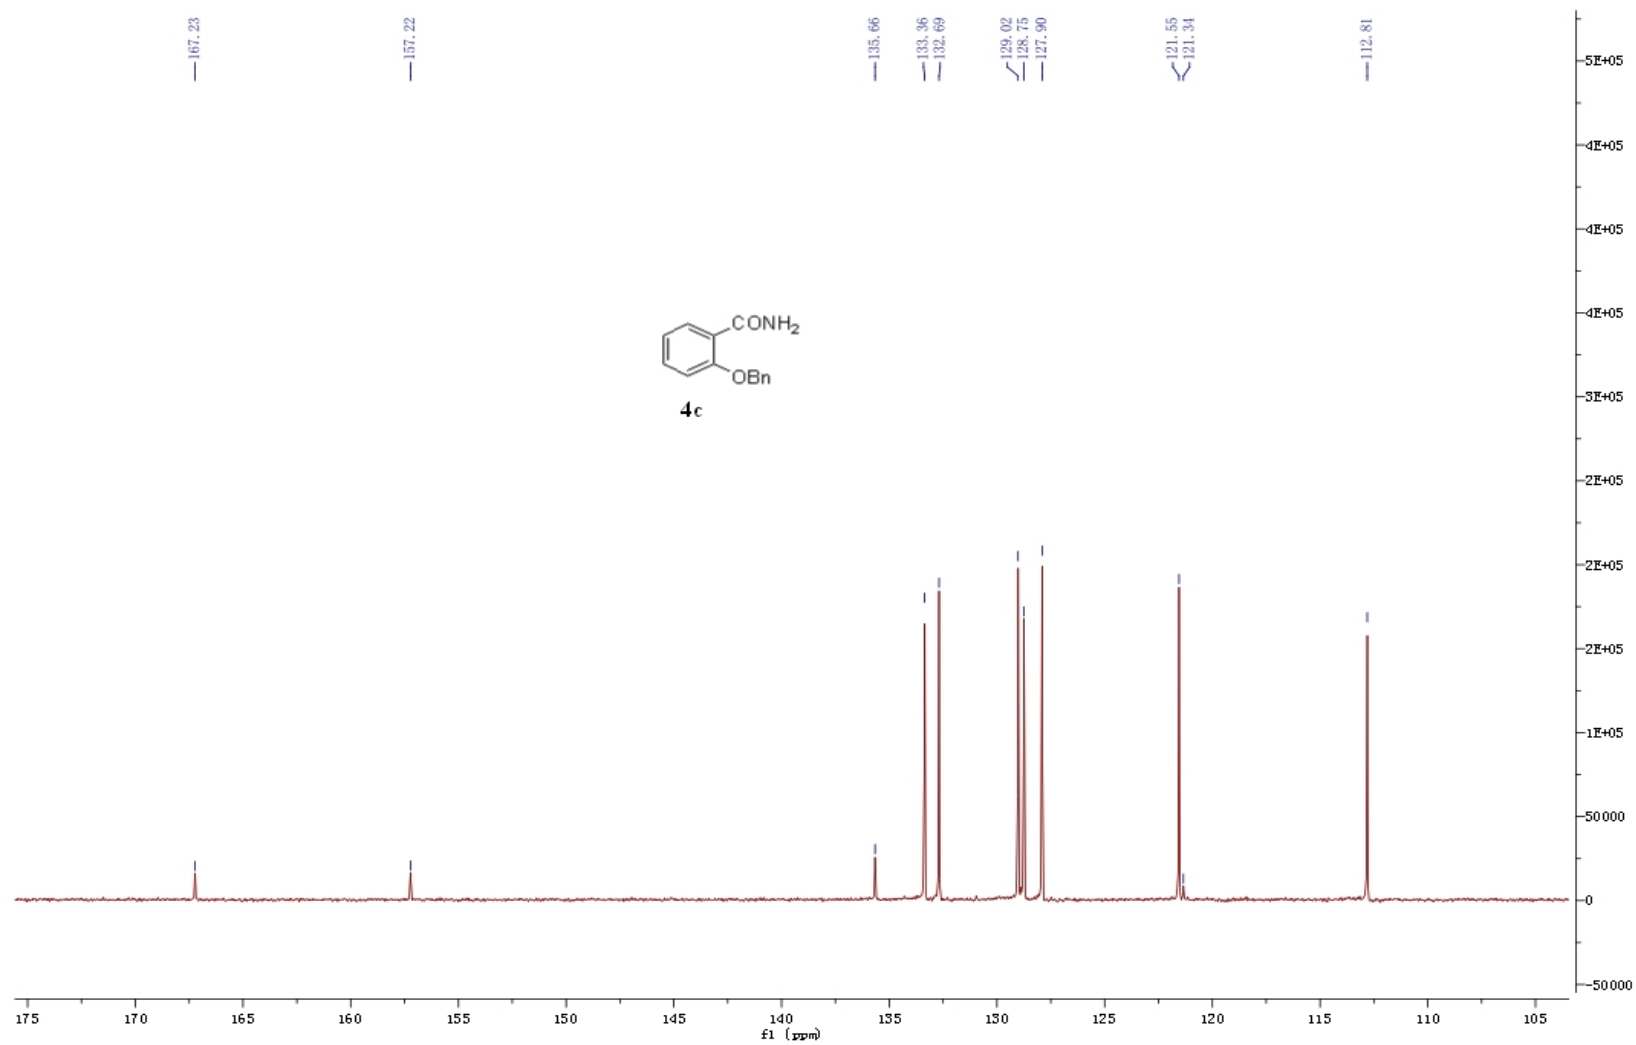



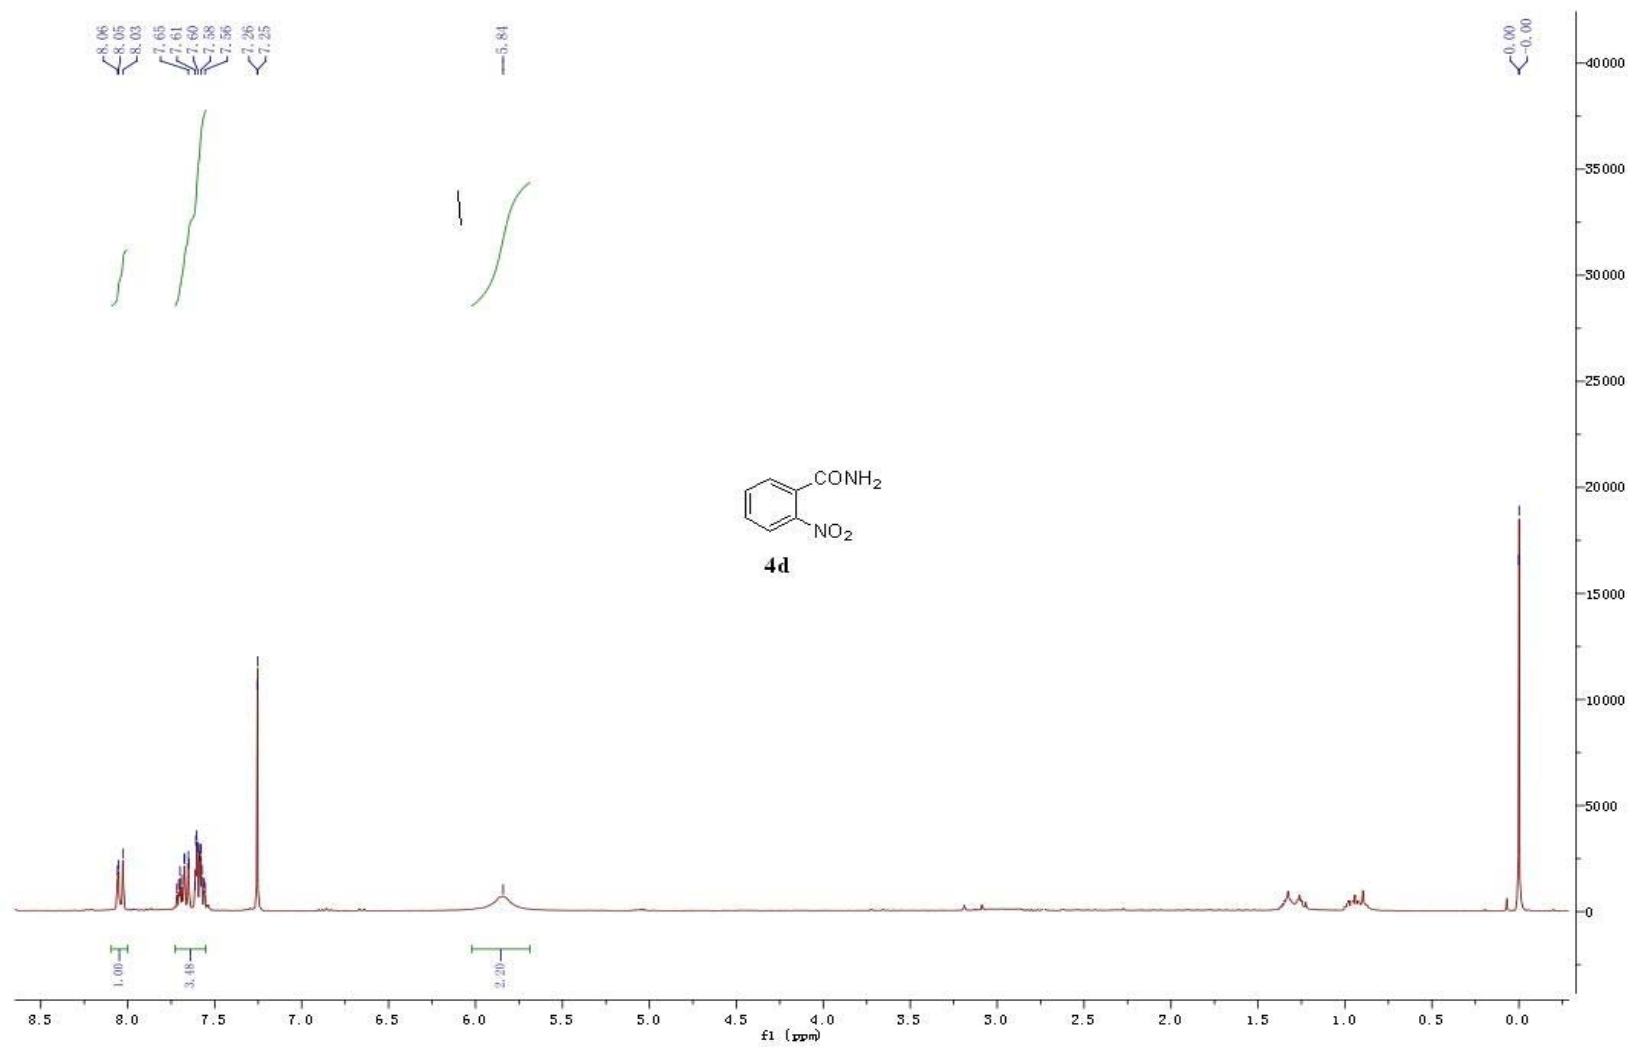

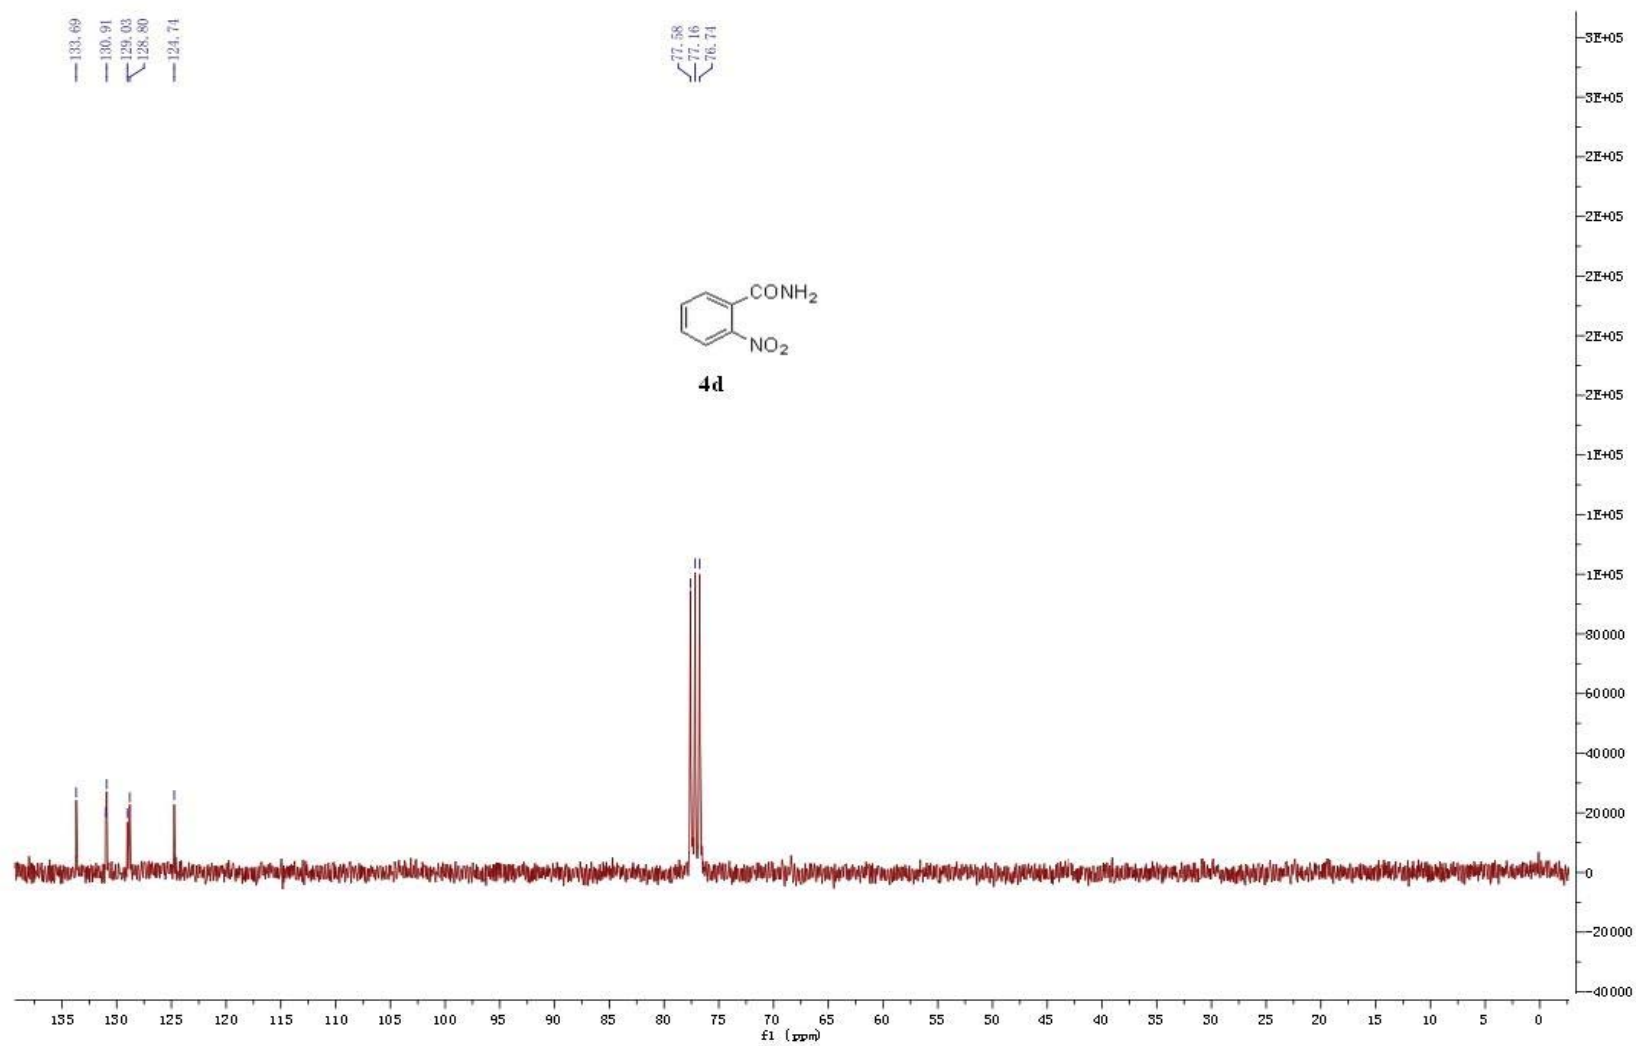

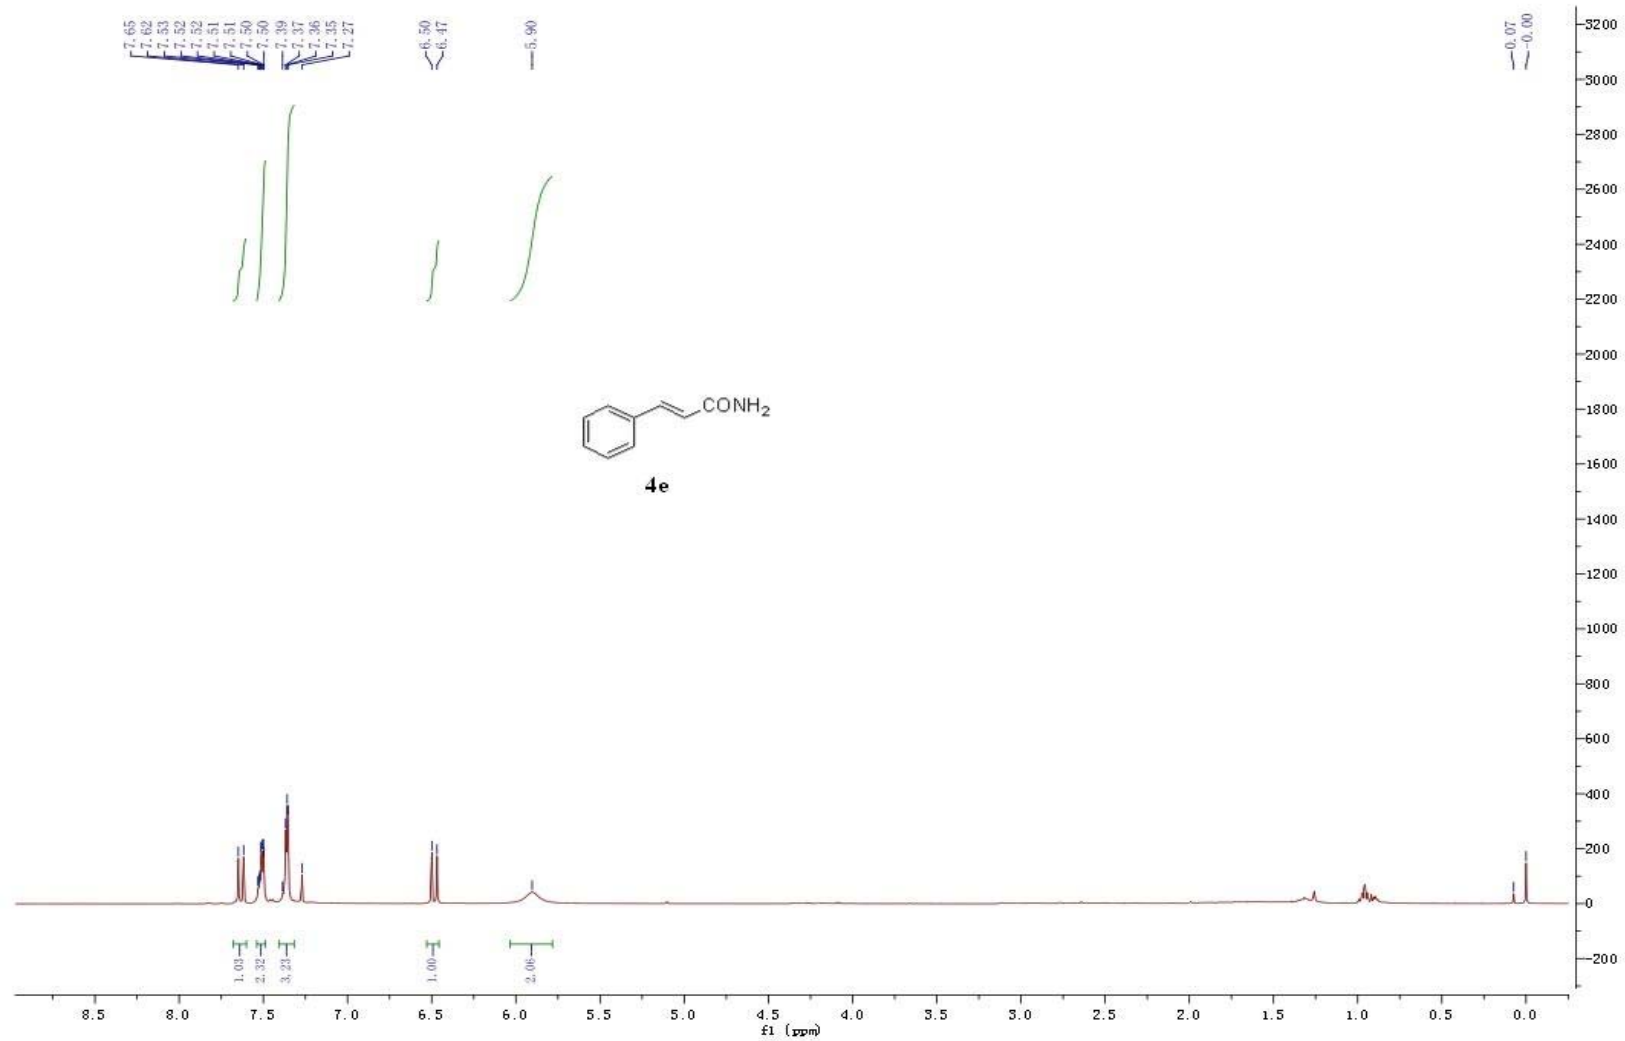

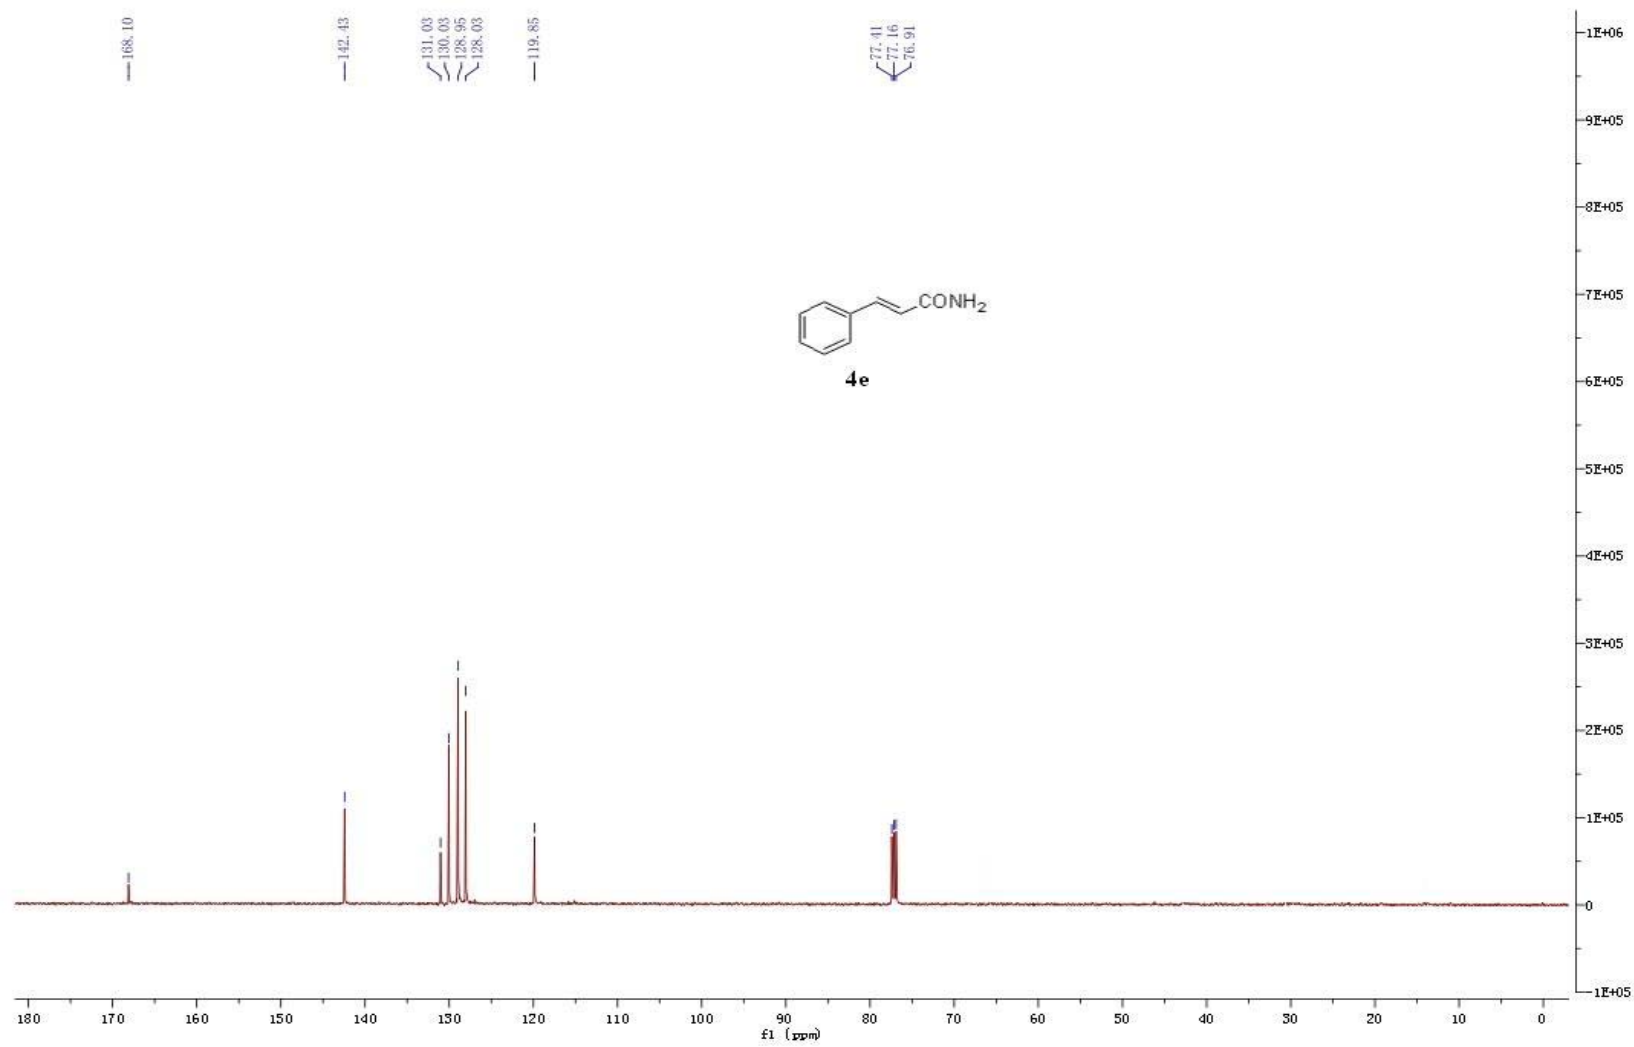

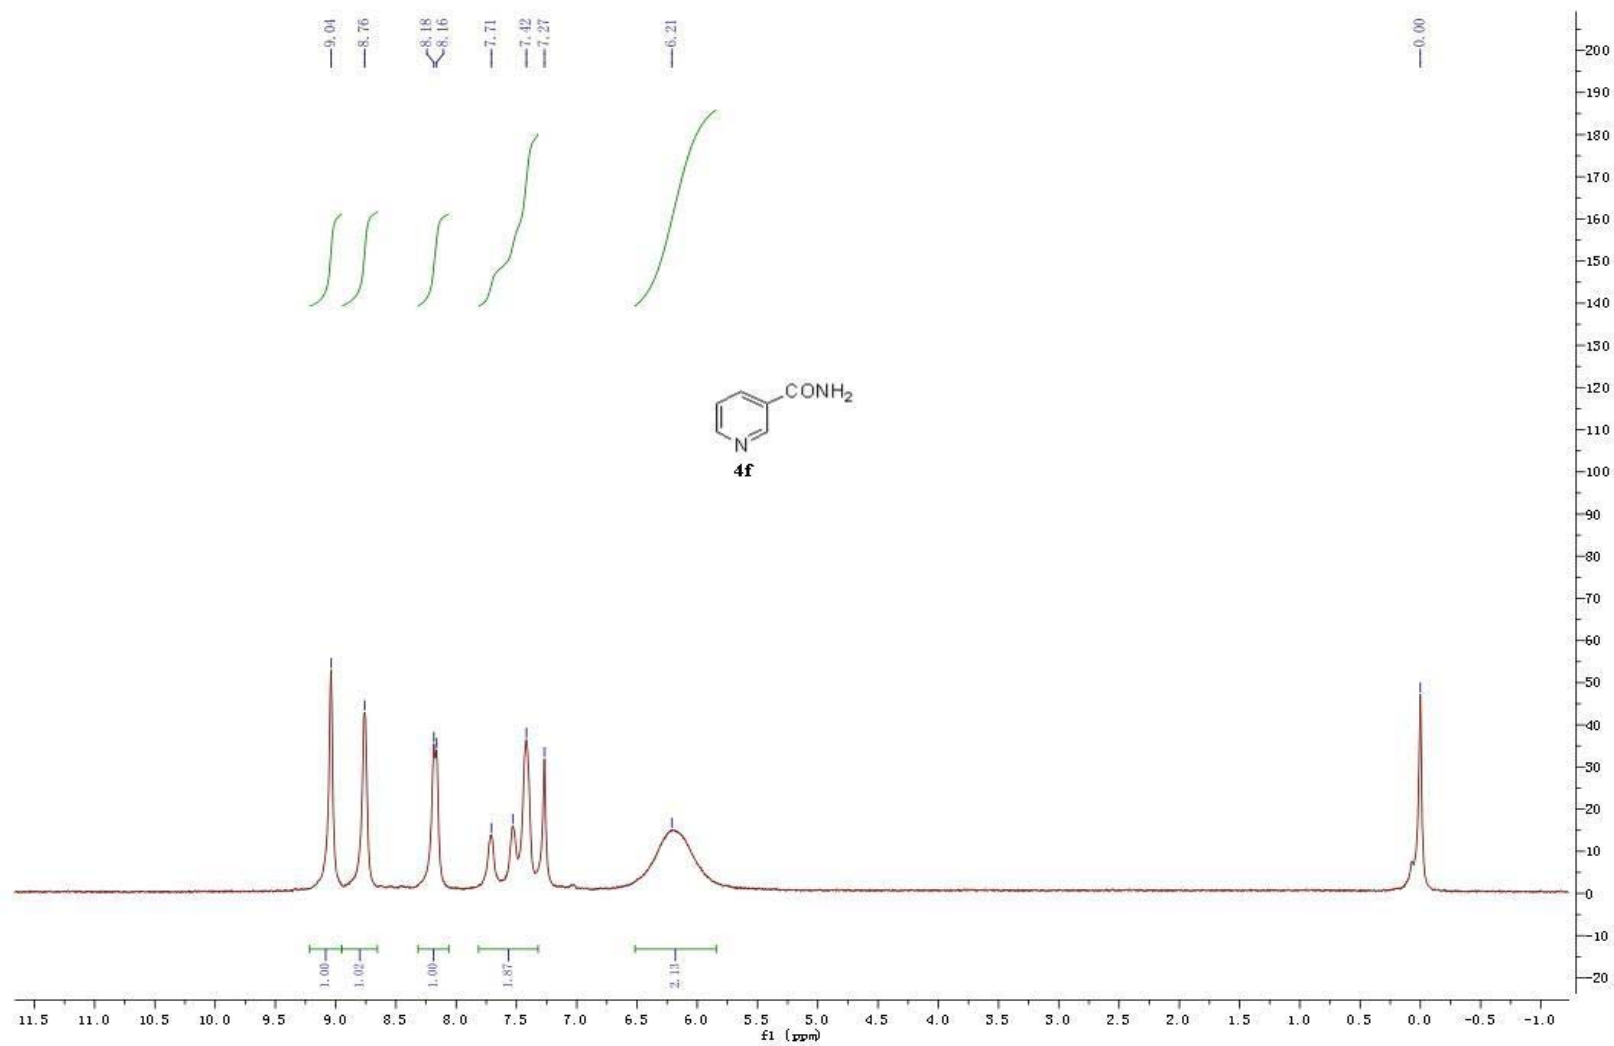

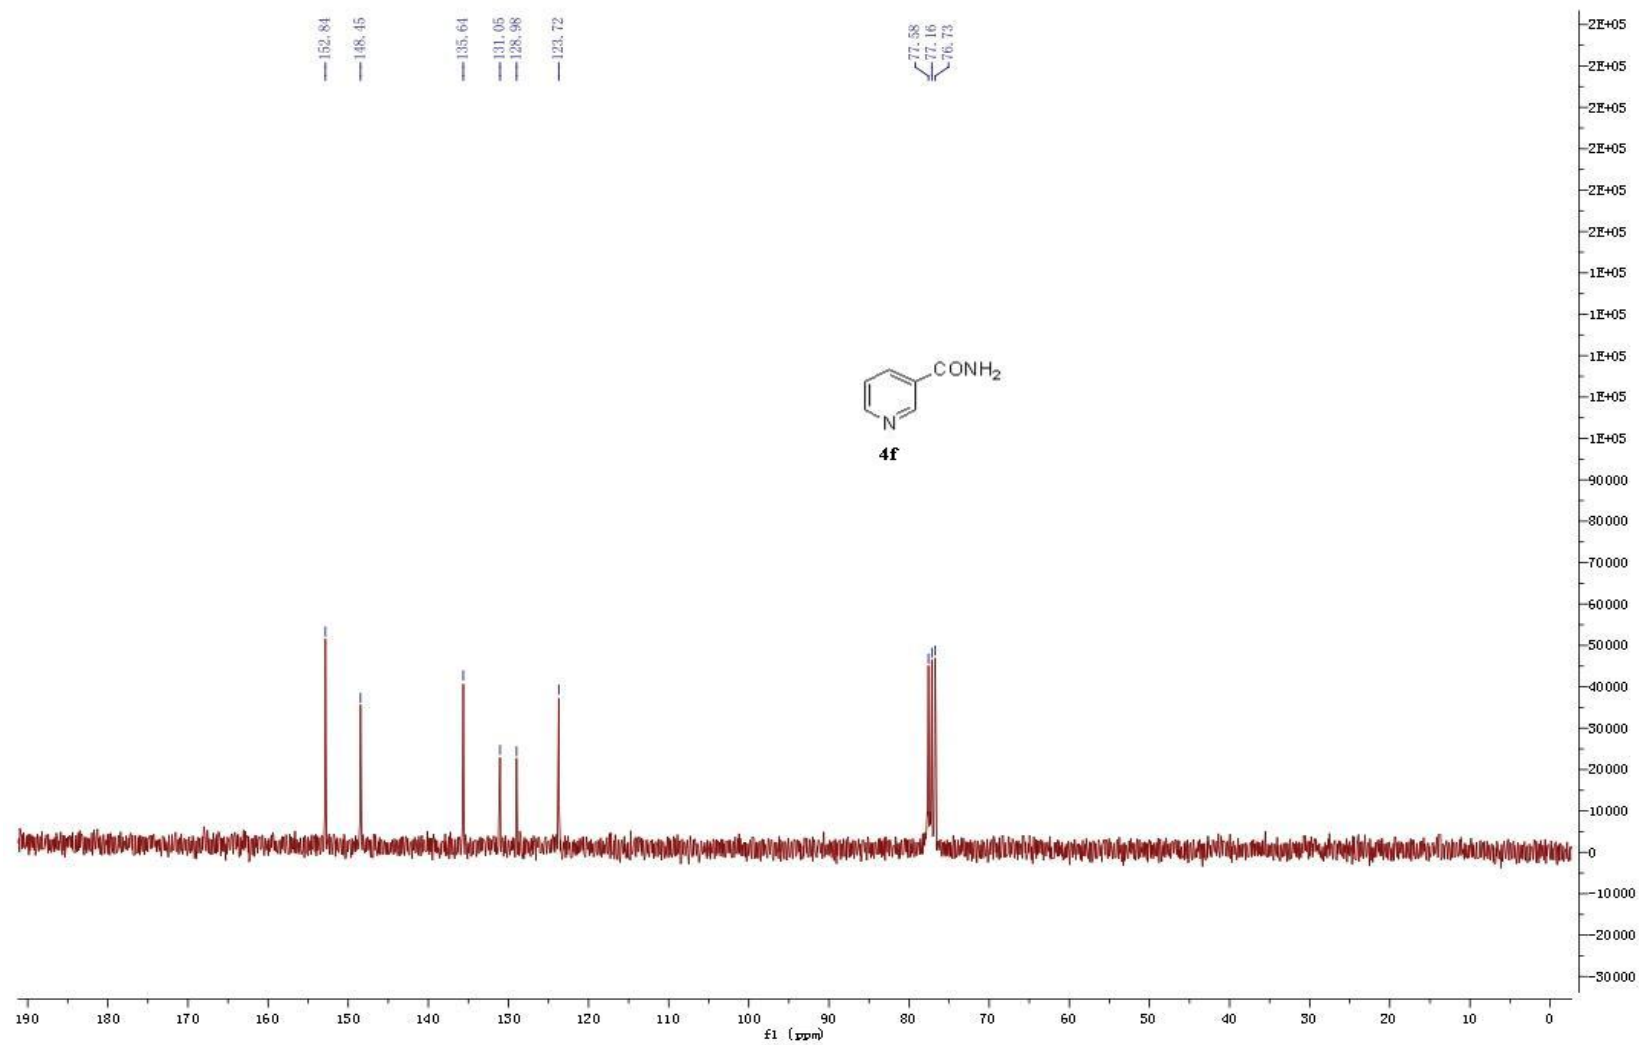

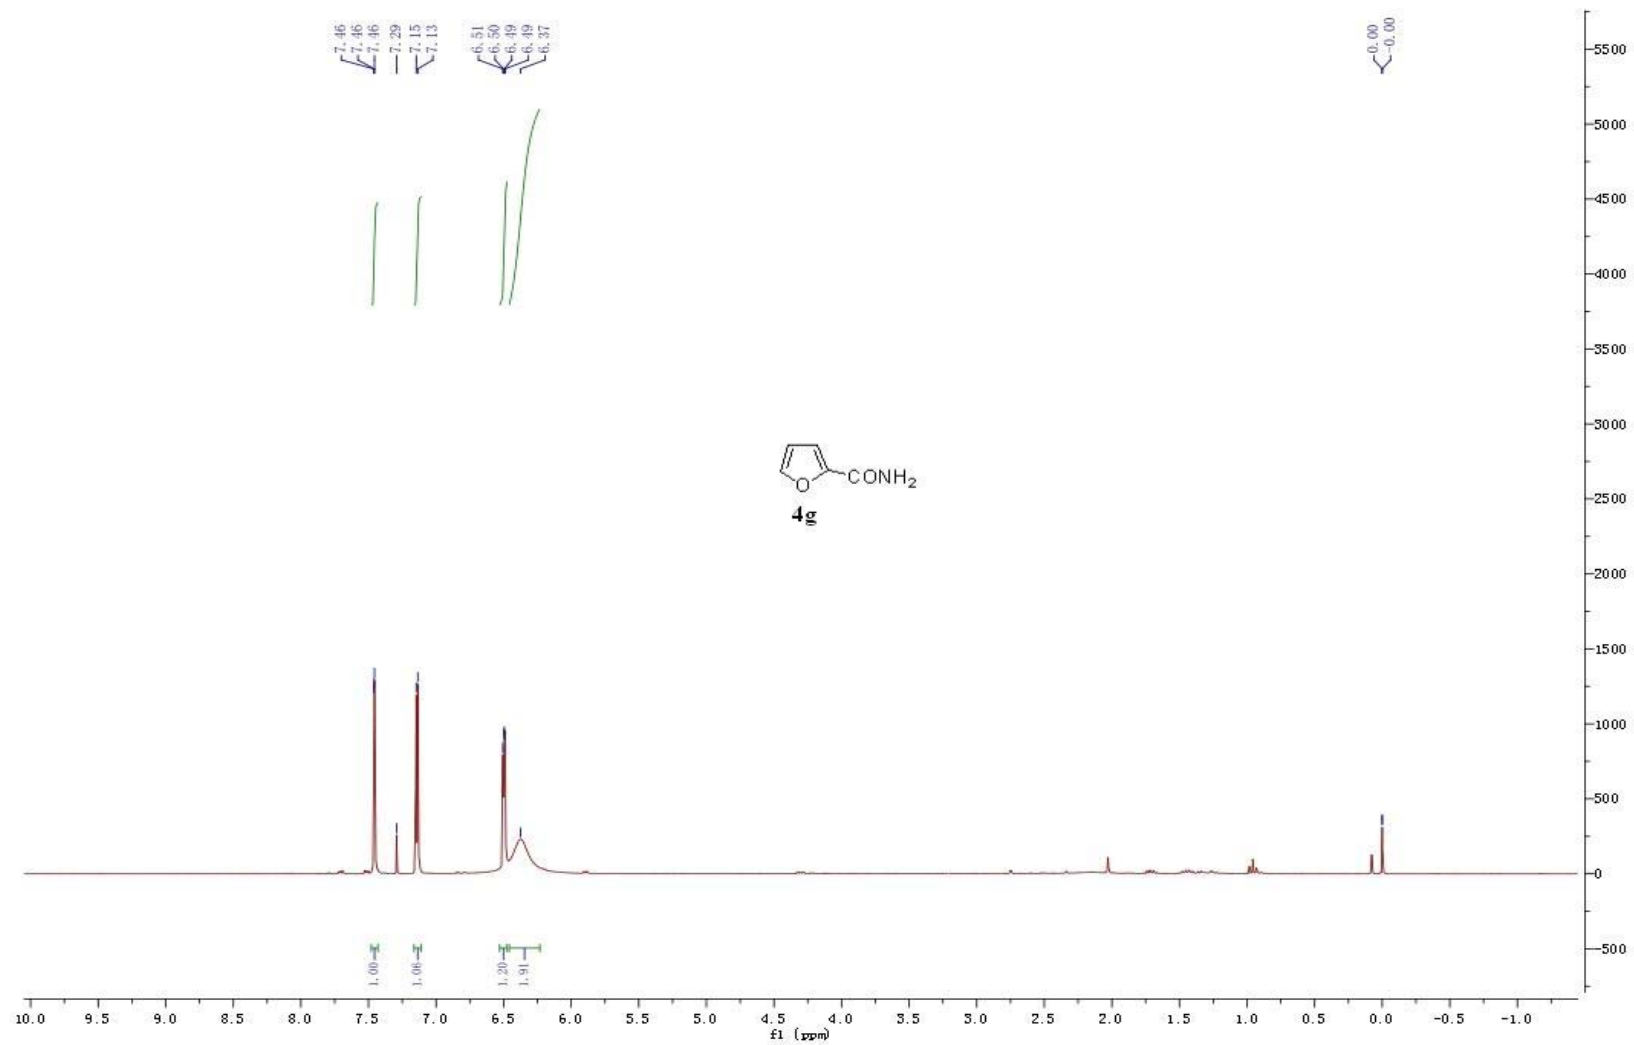

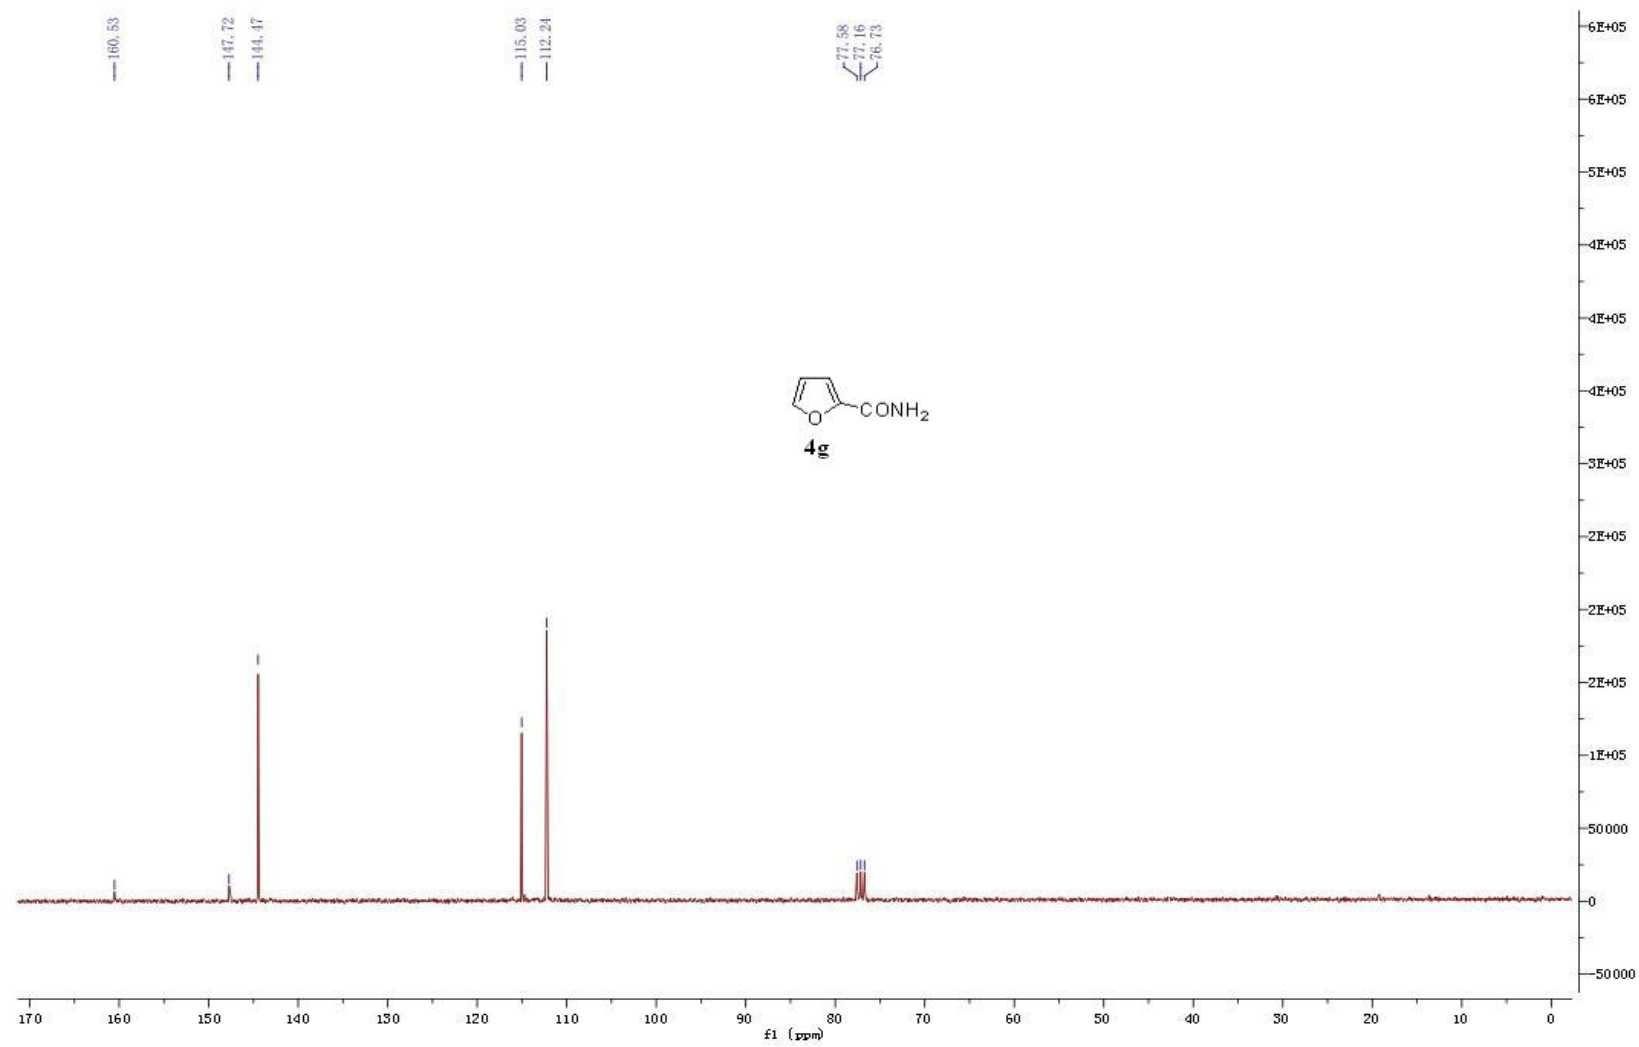

Supplement: c3ob00002h.pdf [file c3ob00002h.pdf]
